# Supplementary material for: Self-reported sick leave following a brief preventive intervention on work-related stress: a randomised controlled trial in primary health care
Source: PubMed Central journal article supplement (PMC7986880; doi:10.1136/bmjopen-2020-041157), 2021-03-22
Supplement: bmjopen-2020-041157.draft_revisions.pdf [file bmjopen-2020-041157.draft_revisions.pdf]

# BMJ Open

BMJ Open is committed to open peer review. As part of this commitment we make the peer review history of every article we publish publicly available.

When an article is published we post the peer reviewers' comments and the authors' responses online. We also post the versions of the paper that were used during peer review. These are the versions that the peer review comments apply to.

The versions of the paper that follow are the versions that were submitted during the peer review process. They are not the versions of record or the final published versions. They should not be cited or distributed as the published version of this manuscript.

BMJ Open is an open access journal and the full, final, typeset and author-corrected version of record of the manuscript is available on our site with no access controls, subscription charges or pay-per-view fees (<http://bmjopen.bmj.com>).

If you have any questions on BMJ Open's open peer review process please email [info.bmjopen@bmj.com](mailto:info.bmjopen@bmj.com)

# BMJ Open

## Self-reported sick leave following a brief preventive intervention on work-related stress: a randomised controlled trial in primary health care

|                               |                                                                                                                                                                              |
|-------------------------------|------------------------------------------------------------------------------------------------------------------------------------------------------------------------------|
| Journal:                      | <i>BMJ Open</i>                                                                                                                                                              |
| Manuscript ID                 | bmjopen-2020-041157                                                                                                                                                          |
| Article Type:                 | Original research                                                                                                                                                            |
| Date Submitted by the Author: | 02-Jun-2020                                                                                                                                                                  |
| Complete List of Authors:     | Hultén, Anna-Maria; University of Gothenburg Sahlgrenska Academy, Bjerke, Pernilla; University of Skovde<br>Holmgren, Kristina; University of Gothenburg Sahlgrenska Academy |
| Keywords:                     | PRIMARY CARE, OCCUPATIONAL & INDUSTRIAL MEDICINE, PUBLIC HEALTH, MEDICAL EDUCATION & TRAINING                                                                                |
|                               |                                                                                                                                                                              |

SCHOLARONE™  
Manuscripts

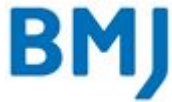

I, the Submitting Author has the right to grant and does grant on behalf of all authors of the Work (as defined in the below author licence), an exclusive licence and/or a non-exclusive licence for contributions from authors who are: i) UK Crown employees; ii) where BMJ has agreed a CC-BY licence shall apply, and/or iii) in accordance with the terms applicable for US Federal Government officers or employees acting as part of their official duties; on a worldwide, perpetual, irrevocable, royalty-free basis to BMJ Publishing Group Ltd ("BMJ") its licensees and where the relevant Journal is co-owned by BMJ to the co-owners of the Journal, to publish the Work in this journal and any other BMJ products and to exploit all rights, as set out in our [licence](#).

The Submitting Author accepts and understands that any supply made under these terms is made by BMJ to the Submitting Author unless you are acting as an employee on behalf of your employer or a postgraduate student of an affiliated institution which is paying any applicable article publishing charge ("APC") for Open Access articles. Where the Submitting Author wishes to make the Work available on an Open Access basis (and intends to pay the relevant APC), the terms of reuse of such Open Access shall be governed by a Creative Commons licence – details of these licences and which [Creative Commons](#) licence will apply to this Work are set out in our licence referred to above.

Other than as permitted in any relevant BMJ Author's Self Archiving Policies, I confirm this Work has not been accepted for publication elsewhere, is not being considered for publication elsewhere and does not duplicate material already published. I confirm all authors consent to publication of this Work and authorise the granting of this licence.

1  
2  
3 **Self-reported sick leave following a brief preventive intervention on work-related stress: a**  
4  
5 **randomised controlled trial in primary health care**  
6  
7

8 Anna-Maria Hultén<sup>a\*</sup>, e-mail: anna-maria.hulten@gu.se  
9

10  
11 Pernilla Bjerkeli<sup>a,b</sup>, e-mail: pernilla.bjerkeli@his.se  
12

13  
14 Kristina Holmgren<sup>a</sup>, e-mail: kristina.holmgren@neuro.gu.se  
15

16  
17 <sup>a</sup>Unit of Occupational Therapy, Department of Health and Rehabilitation, Institute of Neuroscience  
18 and Physiology, Sahlgrenska Academy, University of Gothenburg, Box 455, 405 30 Gothenburg,  
19 Sweden  
20  
21  
22

23  
24 <sup>b</sup>Department for Public Health Research, University of Skövde, Box 408, Skövde, 541 28, Sweden  
25

26  
27 \*Corresponding author  
28  
29  
30  
31  
32  
33  
34  
35  
36  
37  
38  
39  
40  
41  
42  
43  
44  
45  
46  
47  
48  
49  
50  
51  
52  
53  
54  
55  
56  
57  
58  
59  
60

**ABSTRACT**

**Objectives:** To evaluate the effectiveness of a brief intervention about early identification of work-related stress combined with feedback at consultation with a general practitioner (GP) on the number of self-reported sick leave days.

**Design:** Randomised controlled trial. Prospective analyses of self-reported sick leave data collected between November 2015 and January 2017.

**Setting:** Seven primary health care centres in western Sweden.

**Participants:** The study included 271 employed, non-sick-listed patients aged 18–64 years seeking care for mental and/or physical health complaints. Of these, 132 patients were allocated to intervention and 139 patients to control.

**Interventions:** The intervention group received a brief intervention about work-related stress, including training for GPs, screening of patients' work-related stress, feedback to patients on screening results and discussion of measures at GP consultation. The control group received treatment as usual.

**Outcome measures:** The number of self-reported gross sick leave days and the number of self-reported net sick leave days.

**Results:** Separate analyses were performed for 6 and 12 months' follow-up and for five different subsamples. The results indicate that there was no significant difference between the intervention group and the control group.

**Conclusions:** The brief intervention showed no effect on the numbers of self-reported sick leave days for patients seeking care at the primary health care centres. Other actions and new types of interventions need to be explored to address patients' perceiving of ill health due to work-related stress.

**Trial registration number:** NCT02480855, ClinicalTrials.gov.

### STRENGTHS AND LIMITATIONS OF THIS STUDY

- Few previous RCTs have focused on patients' sick leave in a primary health care context.
- Using self-reported sick leave data made it possible to include the first two weeks of sick leave, which are not included in register data.
- Due to the inherent complexity in clinical trials in primary health care practice, the statistical power of the study might have been low.
- Sick leave data are not normally distributed and non-parametric tests therefore had to be used for the analysis.
- The outcome measure (sick leave days) is complex to interpret, as it is used both as an indicator for ill health and as a tool for treatment of ill health.

## INTRODUCTION

Work-related stress has been in focus for decades, as it is common and affects the individual and the society in multiple ways. Depression, anxiety and musculoskeletal disorders are all possible consequences of work-related stress.<sup>1,2</sup> Psychosocial work conditions and work-related stress also constitute risk factors for sick leave.<sup>1</sup> As a consequence, almost 50% of the 3 billion EUR paid for sickness benefits in Sweden in 2018 were due to mental disorders,<sup>3</sup> whereof reaction to severe stress and adjustment disorders constituted half,<sup>4</sup> not to mention the loss of working hours and the costs for treatment and rehabilitation.

Sick leave is a common outcome measure in research. However, the relationship between spells, morbidity and health is complex, since sick leave is influenced strongly by factors other than personal health.<sup>5-7</sup> Hence, controversy exists about how to conceptualise sick leave in research.<sup>6</sup> As individual, social and economic forces jointly determine absence behaviour, aspects other than work-related stress must be considered, such as attendance motivation, absence culture and sickness benefit reform.<sup>6-8</sup> Even so, sick leave can be a useful measure not only of health status and functioning<sup>9</sup> but also of future sick leave and use of disability pension.<sup>10,11</sup> In addition, using self-reported sick leave data makes it possible to consider the first two weeks of absence, which are not included in the Swedish social insurance agency's register data.

Research has shown that there is a strong correlation between sick leave and work-related stress<sup>12,13</sup> and that early identification of persons perceiving ill health is important for preventing sick leave.<sup>11,14</sup> In addition, screening for interacting individual and work factors could make it possible to focus on the patient's specific problems and aid in finding suitable treatments.<sup>15</sup> In Sweden, primary health care is responsible for basic medical treatment, nursing, preventive work and rehabilitation that do not require the medical and technical resources of a hospital or other specialist skills.<sup>16</sup> Primary health care is also considered best suited for preventive work.<sup>16</sup> Since general practitioners (GPs) are often the first health care contact for persons having physical or mental health complaints

1  
2  
3 and often handle cases concerning stress and work ability,<sup>17 18</sup> they could be a possible starting point  
4  
5 for preventive actions concerning ill health due to work-related stress.  
6

7  
8 Commonly, GPs working at a primary health care centre in Sweden have access to several  
9  
10 other healthcare professionals, such as nurses, occupational therapists, physiotherapists and social  
11  
12 workers, sometimes organised in psychosocial teams.<sup>19</sup> However, the proportion of GPs is lower than  
13  
14 for most other comparable high-income countries, as are investments in other primary care  
15  
16 resources.<sup>20</sup> In addition, earlier studies have shown that GPs might not have the prerequisites  
17  
18 needed for early identification and treatment of patients perceiving ill health due to work-related  
19  
20 stress in order to decrease sick leave.<sup>21-23</sup> Therefore, a brief preventive intervention was designed  
21  
22 using the Work Stress Questionnaire (WSQ)<sup>24 25</sup> as a screening tool in combination with feedback at  
23  
24 patient–GP consultations.<sup>26</sup>  
25  
26  
27  
28

## 29 **METHOD**

30  
31 This two-armed non-blinded randomised controlled trial (RCT) was conducted at primary health care  
32  
33 centres (PHCC) located in both urban and rural areas in the region Västra Götaland in Sweden. The  
34  
35 trial has been previously described in detail in a study protocol<sup>26</sup> and in a research article.<sup>27</sup>  
36  
37  
38  
39

## 40 **Objectives**

41  
42 The objective of the study was to evaluate the effectiveness of the brief intervention about early  
43  
44 identification of work-related stress combined with feedback at GP consultation on the number of  
45  
46 self-reported sick leave days. The overall hypothesis was that the intervention group would have  
47  
48 fewer sick leave days during the year after the brief intervention compared to the control group. The  
49  
50 assumptions behind this were that (1) taking part in an initial training session increased the GPs'  
51  
52 knowledge on work-related stress, (2) filling in the WSQ raised the patients' awareness about their  
53  
54 level of work-related stress through self-reflection, (3) receiving feedback on WSQ results increased  
55  
56 the patients' motivation to address their work situation and (4) the combined effect of the training  
57  
58  
59  
60



1  
2  
3 session, filling in the WSQ and receiving feedback constituted a basis for in-depth discussions on  
4  
5 relevant measures at the GP–patient consultation.  
6

7           The intervention concerned sick leave due to work-related stress. Hence, it was assumed that  
8  
9 the effect of the intervention was higher for patients reporting high work-related stress or high  
10  
11 exposure to stressors according to the WSQ. This group was therefore studied explicitly.  
12  
13

### 14 15 16 **Procedure**

17  
18 Seven PHCCs were included in the study, of which four were public and three were privately run.  
19  
20 Participating GPs had to be working at least 50% of the time at the PHCC. The recruitment of patients  
21  
22 and the performance of the interventions were conducted in parallel for a period of 4–12 weeks at  
23  
24 each PHCC from May 2015 until January 2016. Before the intervention period, the research team  
25  
26 visited the centre to inform the staff about the study. During the intervention period, a research  
27  
28 assistant was stationed at the PHCC to identify and recruit the eligible participants, give information  
29  
30 on the study and administer patients' informed consent. In addition, extra personnel resources were  
31  
32 needed to perform the training session and to administer the WSQ to the patients.  
33  
34  
35  
36  
37

### 38 **Intervention**

39  
40 As an initial step, the GPs randomised to intervention received a two-hour training session including  
41  
42 information about work-related stress, ill health and sick leave. Instructions were also given on how  
43  
44 to use the WSQ and how to give feedback to the participants; in addition, GPs received information  
45  
46 on healthcare professionals available for referral. Before the GP–patient consultation, each patient  
47  
48 filled in the WSQ and questions on background characteristics. During consultation, the intervention  
49  
50 GPs gave feedback to the patients on the WSQ results. In addition, the GP and patient conferred  
51  
52 about and initiated preventive measures, if needed.  
53  
54  
55  
56

### 57 **Control**

58  
59  
60

1  
2  
3 The GPs randomised to control were instructed to carry on as usual with their consultations and  
4  
5 were not informed as to whether or not the patients were participating in the study. After the  
6  
7 consultation, the control patients filled in the WSQ and gave information about background  
8  
9 characteristics.  
10

### 11 12 13 **Outcomes**

14  
15  
16 The study had two primary outcome measures: 1. Number of self-reported gross sick leave days and  
17  
18 2. Number of self-reported net sick leave days. The measures were based on the following request at  
19  
20 follow-up: Define your sick leave during the latest 3 or 6 months, each occasion separately (number  
21  
22 of days with sick leave and extent of sick leave per occasion: 0%, 25%, 50%, 75%, 100% or varying  
23  
24 extent). A reported varying extent of sick leave was treated as a 50% sick leave.  
25  
26

27  
28 Follow-up data were collected at 6 and 12 months after the intervention by telephone or  
29  
30 email. At 6 months' follow-up the prior 3 months were reported, while at 12 months' follow-up the  
31  
32 prior 6 months were reported. Data for the two follow-ups were treated separately. The number of  
33  
34 self-reported gross sick leave days for each follow-up was calculated as the sum of the number of  
35  
36 self-reported sick leave days for each sick leave occasion during these months. To calculate the  
37  
38 number of self-reported net sick leave days for each follow-up, the self-reported days of sick leave  
39  
40 for each occasion was multiplied by the corresponding extent of sick leave and summarised.  
41  
42

43  
44 The variable of self-reported gross sick leave days was categorised into four levels: 0, 1–7, 8–  
45  
46 14 and 15 days and above. These categories were based on the Swedish sickness insurance scheme<sup>28</sup>  
47  
48 stating that the employer pays sick pay for up to two weeks, with one qualifying day. Thereafter,  
49  
50 sickness benefits are handled by the Swedish Social Insurance Agency. From day 8 of sickness  
51  
52 onward, a doctor's certificate is required.  
53  
54

### 55 56 **Target group, sample size and power**

57  
58 Patients eligible to participate had to be employed, non-sick-listed, 18–64 years of age and seeking  
59  
60 care for mental and/or physical health complaints. The PHCCs were economically compensated for

1  
2  
3 each participant recruited. An a priori power analysis was performed to detect at least a 15%  
4  
5 difference between the intervention group and the control group concerning the primary outcome,  
6  
7 that is, the number of registered sick leave days (14 days or more) during 12 months after inclusion.  
8  
9 With a two-sided test, statistical significance of  $p < 0.05$  and 80% power, at least 135 participants were  
10  
11 needed in each group.  
12  
13  
14  
15

### 16 **Randomisation and blinding**

17  
18 The GPs at the participating PHCCs were randomised to either the intervention group or the control  
19  
20 group with a 1:1 allocation. Folded slips of paper with their written names were mixed in a non-  
21  
22 transparent bowl and subsequently drawn, one at a time, to the two groups alternately by colleagues  
23  
24 not involved in the RCT. The patients consulting the GPs were therefore automatically allocated to  
25  
26 either group. Due to the setup of the trial, none of the parties involved were blinded after  
27  
28 assignment to interventions. All patients received the study information provided by the research  
29  
30 assistant, the intervention GPs received information and training before the study started and the  
31  
32 control GPs received information about the study but no training.  
33  
34  
35  
36  
37

### 38 **Statistical analyses**

39  
40 Outcome data were missing for some patients, due to non-response at follow-up. Therefore, a  
41  
42 comparison was made to test whether there were differences in characteristics between patients  
43  
44 taking part at 6 and 12 months' follow-up, respectively, and the participants at baseline. Differences  
45  
46 in gender proportion, age and health status were tested using chi-square test. As no statistically  
47  
48 significant differences were observed, the patients taking part at the follow-up were included in the  
49  
50 main analysis. A descriptive analysis was then performed for the categorised length of self-reported  
51  
52 gross sick leave, to get an overall understanding of the distribution of sick leave.  
53  
54  
55

56 For the main analysis, a comparison between the intervention and control groups was made  
57  
58 for the gross and net numbers of sick leave days at each follow-up. As the distribution strongly  
59  
60 deviated from a normal distribution, the Mann-Whitney U test was used. Additional analyses were

1  
2  
3 conducted on five subsamples with patients highly exposed to stressors. The subsamples were  
4 identified based on the results from the WSQ,<sup>24</sup> which is a self-assessment questionnaire developed  
5 for early identification of people with work-related stress at risk for sick leave. The WSQ is divided  
6 into four dimensions with a total of 21 questions concerning influence at work, work organisation  
7 and conflicts, and individual demands and commitment as well as interference between work and  
8 leisure time. The subsamples were defined as follows:  
9  
10  
11  
12  
13  
14

- 15 1. *Low influence at work* included patients' seldom or never perceiving influence at work.
- 16 2. *High stress due to indistinct organisation and conflicts* included patients perceiving their  
17 work organisation and occurring conflicts as stressful or very stressful.
- 18 3. *High stress due to individual demands and commitment* included patients perceiving their  
19 own work demands and commitment as stressful or very stressful.
- 20 4. *High work to leisure time interference* included patients always or rather often perceiving  
21 interference between work and leisure.
- 22 5. *Effect from one subsample or more* included participants belonging to at least one of the  
23 above-described subsamples 1–4.

24  
25  
26  
27  
28  
29  
30  
31  
32  
33  
34  
35  
36 All answers were given on a four-point ordinal scale. A missing value in a dimension was replaced by  
37 the participant's median for that dimension, but only if there were answers to at least 50% of the  
38 questions in the dimension. The median values for each dimension were then categorised into high  
39 and low. All statistical analyses were performed in IBM SPSS Statistics 25.  
40  
41  
42  
43  
44  
45  
46

#### 47 **Patient and public involvement statement**

48  
49 There was no patient or public involvement in the planning or conduct of this trial.  
50  
51  
52

## 53 **RESULTS**

### 54 **Participant flow**

55  
56  
57  
58  
59  
60

1  
2  
3 The 66 eligible GPs at the seven PHCCs were randomised to the intervention group or the control  
4 group, Figure 1. Since three GPs declined to participate or did not have patients fulfilling the criteria,  
5 there were 29 intervention GPs and 34 control GPs included. Following recruitment, 139 patients  
6 were allocated to the intervention group and 162 patients to the control group. Of these, 7 patients  
7 in the intervention group and 23 in the control group were excluded due to patients declining to  
8 participate or due to logistic reasons. Altogether, 271 patients received treatment (intervention  
9 n=132 and control n=139). Independent of group allocation, 51/271 (19%) participating patients  
10 were lost to the 6-month follow-up and 30/271 (11%) to the 12-month follow-up. Of these, 13/271  
11 (5%) did not participate in either of the follow-ups. At 6 months' follow-up data from 220 patients  
12 were included in the main analysis, while at 12 months' follow-up data from 241 patients were  
13 included. A flowchart for the enrolment, allocation and follow-ups is presented in Figure 1.  
14  
15  
16  
17  
18  
19  
20  
21  
22  
23  
24  
25  
26  
27  
28  
29  
30  
31

*Insert Figure 1*

32 *Figure 1 Flowchart of enrolment, allocation and follow up.*

### 33 **Baseline data**

34  
35  
36  
37  
38 As shown in Table 1, the intervention group and the control group had similar distribution of  
39 background characteristics at baseline (n=271). However, the participants in the intervention group  
40 were slightly older and sought care for musculoskeletal ill health to a higher extent.  
41  
42  
43  
44

45 Results from the WSQ showed that 40% of the patients assessed their influence at work as  
46 low, independent of group. Approximately 20% of the patients reported high stress due to indistinct  
47 organisation and conflicts, while slightly fewer than 50% reported high stress due to high individual  
48 demands and work commitment. The fourth dimension, interference of work with leisure time, was  
49 high for 40% of the patients. Finally, 70% of the patients had stressors or stress from at least one of  
50 the four dimensions (effect from one subsample or more).  
51  
52  
53  
54  
55  
56  
57  
58  
59  
60

**Table 1** *Baseline characteristics of the 271 patients included in the randomised controlled trial and allocated to the intervention group or the control group.*

| Variable                                |                                        | Total (n=271) |     | Intervention (n=132) |     | Control (n=139) |     |
|-----------------------------------------|----------------------------------------|---------------|-----|----------------------|-----|-----------------|-----|
|                                         |                                        | n             | (%) | n                    | (%) | n               | (%) |
| Sex                                     | Male                                   | 86            | 32  | 44                   | 33  | 42              | 30  |
|                                         | Female                                 | 185           | 68  | 88                   | 67  | 97              | 70  |
| Age (years)                             | 18–30                                  | 47            | 17  | 21                   | 16  | 26              | 19  |
|                                         | 31–50                                  | 134           | 50  | 58                   | 44  | 76              | 54  |
|                                         | 51–64 <sup>1</sup>                     | 90            | 33  | 53                   | 40  | 37              | 27  |
| Occupational class                      | Skilled/unskilled manual               | 107           | 40  | 49                   | 37  | 58              | 42  |
|                                         | Medium/low non-manual                  | 116           | 43  | 60                   | 46  | 56              | 40  |
|                                         | High-level non manual                  | 47            | 17  | 23                   | 17  | 24              | 17  |
|                                         | Missing                                | 1             | 0   |                      |     | 1               | 1   |
| Overall health, self-rated <sup>2</sup> | Excellent/very good                    | 77            | 28  | 34                   | 26  | 43              | 30  |
|                                         | Good                                   | 108           | 40  | 53                   | 40  | 55              | 40  |
|                                         | Satisfactory/unsatisfactory            | 73            | 27  | 39                   | 30  | 34              | 25  |
|                                         | Missing                                | 13            | 5   | 6                    | 4   | 7               | 5   |
| Reason for consultation <sup>3</sup>    | Mental or behavioural                  | 144           | 53  | 75                   | 57  | 69              | 50  |
|                                         | Musculoskeletal <sup>1</sup>           | 106           | 39  | 62                   | 47  | 44              | 32  |
|                                         | Gastrointestinal                       | 54            | 20  | 26                   | 20  | 28              | 20  |
|                                         | Cardiovascular                         | 32            | 12  | 16                   | 12  | 16              | 13  |
|                                         | Other                                  | 56            | 21  | 29                   | 22  | 27              | 19  |
| WSQ results <sup>4</sup>                | Low influence at work                  | 108           | 40  | 54                   | 41  | 54              | 39  |
|                                         | High stress organisation and conflicts | 54            | 20  | 28                   | 21  | 26              | 19  |
|                                         | High stress demands and work commit.   | 124           | 46  | 63                   | 48  | 61              | 44  |
|                                         | High work to leisure time interference | 109           | 40  | 54                   | 41  | 55              | 40  |
|                                         | Effect from one subsample or more      | 188           | 69  | 91                   | 69  | 97              | 70  |

<sup>1</sup>Statistically significant differences (tested with a 95% confidence interval for difference in proportion between case and control)

<sup>2</sup>Short Form Health Survey, SF-36<sup>29</sup>

<sup>3</sup>More than one reason for consultation was possible

<sup>4</sup>Work Stress Questionnaire results from the four dimensions dichotomized into high and low levels as well as from the summary variable including effect from at least one dimension

### Analysis of participants responding at follow-up

The basic characteristics of the participants in the intervention and the control groups responding at follow-up are shown in Table 2. No statistically significant differences were found between baseline and responders at 6 and 12 months' follow-up concerning sex, age or self-rated health.

**Table 2** *Characteristics of participants responding in the intervention group and the control group at 6 and 12 months' follow-up compared to baseline.*

| Variable, 6 months (n=220) |                     | Intervention |                           |                      | Control  |                           |                      |
|----------------------------|---------------------|--------------|---------------------------|----------------------|----------|---------------------------|----------------------|
|                            |                     | Baseline     | Respond part <sup>1</sup> | p-value <sup>2</sup> | Baseline | Respond part <sup>1</sup> | p-value <sup>2</sup> |
| Numbers                    |                     | 132          | 105                       |                      | 139      | 115                       |                      |
| Sex                        | Male                | 44           | 33                        | 0.756                | 42       | 35                        | 0.970                |
|                            | Female              | 88           | 72                        |                      | 97       | 80                        |                      |
| Age (years)                | 18–30               | 21           | 17                        | 0.950                | 26       | 23                        | 0.908                |
|                            | 31–50               | 58           | 44                        |                      | 76       | 64                        |                      |
|                            | 51–64               | 53           | 44                        |                      | 37       | 28                        |                      |
| Overall                    | Excellent/very good | 34           | 26                        |                      | 43       | 36                        |                      |

|                                         |                             |                     |                               |                            |                 |                               |                            |
|-----------------------------------------|-----------------------------|---------------------|-------------------------------|----------------------------|-----------------|-------------------------------|----------------------------|
| health, self-rated <sup>3</sup>         | Good                        | 53                  | 39                            | 0.807                      | 55              | 45                            | 0.988                      |
|                                         | Satisfactory/unsatisfactory | 39                  | 35                            |                            | 34              | 27                            |                            |
|                                         | Missing                     | 6                   | 5                             |                            | 7               | 7                             |                            |
| <b>Variable, 12 months (n=241)</b>      |                             | <b>Intervention</b> |                               |                            | <b>Control</b>  |                               |                            |
|                                         |                             | <b>Baseline</b>     | <b>Responders<sup>4</sup></b> | <b>p-value<sup>2</sup></b> | <b>Baseline</b> | <b>Responders<sup>1</sup></b> | <b>p-value<sup>2</sup></b> |
| Numbers                                 |                             | 132                 | 119                           |                            | 139             | 122                           |                            |
| Sex                                     | Male                        | 44                  | 39                            | 0.925                      | 42              | 40                            | 0.655                      |
|                                         | Female                      | 88                  | 80                            |                            | 97              | 82                            |                            |
| Age (years)                             | 18–30                       | 21                  | 20                            | 0.951                      | 26              | 24                            | 0.869                      |
|                                         | 31–50                       | 58                  | 50                            |                            | 76              | 69                            |                            |
|                                         | 51–64                       | 53                  | 49                            |                            | 37              | 29                            |                            |
| Overall health, self-rated <sup>3</sup> | Excellent/very good         | 34                  | 32                            | 0.968                      | 43              | 38                            | 0.968                      |
|                                         | Good                        | 53                  | 46                            |                            | 55              | 49                            |                            |
|                                         | Satisfactory/unsatisfactory | 39                  | 35                            |                            | 34              | 28                            |                            |
|                                         | Missing                     | 6                   | 6                             |                            | 7               | 7                             |                            |

<sup>1</sup>6 months' follow-up

<sup>2</sup>Testing the distribution between baseline and responders at 6 months' follow-up concerning sex, age and health with Pearson's chi-2 test

<sup>3</sup>Short Form Health Survey, SF-36<sup>29</sup>

<sup>4</sup>12 months' follow-up

### Descriptive statistics of sick leave

As shown in Figure 2, 59/105 in the intervention group and 61/115 in the control group reported no sick leave at the 6-month follow-up. At the 12-month follow-up the corresponding numbers were 61/119 and n=57/122, respectively.

*Insert Figure 2*

**Figure 2** *Total days of sick leave per individual at 6 months' follow-up (n=105 in the intervention group and n=115 in the control group) and at 12 months' follow-up (n=119 in the intervention group and n=122 in the control group).*

### Main analysis of sick leave

The main analysis included 220 participants at 6 months' follow-up and 241 participants at 12 months' follow-up (Figure 1). The median and quartiles for both gross and net sick leave days are shown in Table 3. There was no statistically significant difference between the intervention group and the control group.

### Sick leave in subsamples

The comparison of numbers of gross sick leave days for the five subsamples is shown in Table 3.

There were no statistically significant differences between the intervention group and the control group for any of these groups.

**Table 3** Comparison of sick leave days between the intervention group and the control group at 6 and 12 months' follow-up including analysis for five subsamples.

| Follow-up                                | Sick leave                   | Group        | Quartiles |     |      | p-value <sup>1</sup> |
|------------------------------------------|------------------------------|--------------|-----------|-----|------|----------------------|
|                                          |                              |              | 25        | 50  | 75   |                      |
| 6 months, (n=220)                        | Gross days                   | Intervention | 0.0       | 0.0 | 6.0  | 0.449                |
|                                          |                              | Control      | 0.0       | 0.0 | 10.0 |                      |
|                                          | Net days                     | Intervention | 0.0       | 0.0 | 5.9  | 0.398                |
|                                          |                              | Control      | 0.0       | 0.0 | 9.0  |                      |
| 12 months, (n=241)                       | Gross days                   | Intervention | 0.0       | 0.0 | 7.0  | 0.505                |
|                                          |                              | Control      | 0.0       | 1.0 | 7.2  |                      |
|                                          | Net days                     | Intervention | 0.0       | 0.0 | 6.2  | 0.490                |
|                                          |                              | Control      | 0.0       | 1.0 | 6.2  |                      |
| Subsamples                               | Sick leave                   | Group        | 25        | 50  | 75   | p-value <sup>1</sup> |
| Low influence                            | Gross days 6 months, (n= 89) | Intervention | 0.0       | 1.0 | 10.0 | 0.810                |
|                                          |                              | Control      | 0.0       | 0.5 | 27.0 |                      |
|                                          | Gross days 12 months (n= 94) | Intervention | 0.0       | 2.0 | 7.0  | 0.916                |
|                                          |                              | Control      | 0.0       | 2.0 | 6.0  |                      |
| Stress due to organisation and conflicts | Gross days 6 months (n=45)   | Intervention | 0.0       | 0.0 | 7.5  | 0.931                |
|                                          |                              | Control      | 0.0       | 0.0 | 17.5 |                      |
|                                          | Gross days 12 months (n=47)  | Intervention | 0.0       | 2.5 | 7.7  | 0.877                |
|                                          |                              | Control      | 0.0       | 2.0 | 12.0 |                      |
| Stress due to commitment                 | Gross days 6 months (n=103)  | Intervention | 0.0       | 1.0 | 14.5 | 0.793                |
|                                          |                              | Control      | 0.0       | 0.0 | 10.2 |                      |
|                                          | Gross days 12 months (n=106) | Intervention | 0.0       | 2.0 | 8.0  | 0.321                |
|                                          |                              | Control      | 0.0       | 0.0 | 5.0  |                      |
| Work to leisure time interference        | Gross days 6 months (n=89)   | Intervention | 0.0       | 0.0 | 6.5  | 0.446                |
|                                          |                              | Control      | 0.0       | 0.0 | 30.0 |                      |
|                                          | Gross days 12 months (n=96)  | Intervention | 0.0       | 2.0 | 10.0 | 0.296                |
|                                          |                              | Control      | 0.0       | 0.0 | 5.0  |                      |
| Effect, any dimension                    | Gross days 6 months (n=154)  | Intervention | 0.0       | 0.0 | 8.0  | 0.492                |
|                                          |                              | Control      | 0.0       | 0.0 | 19.0 |                      |
|                                          | Gross days 12 months (n=164) | Intervention | 0.0       | 2.0 | 8.7  | 0.310                |
|                                          |                              | Control      | 0.0       | 1.0 | 5.7  |                      |

<sup>1</sup>Mann-Whitney U test

## DISCUSSION

### Principal findings

This study investigated differences in self-reported sick leave between patients receiving a brief intervention to prevent sick leave due to work-related stress and those receiving treatment as usual.

The results indicate that there was no significant difference in self-reported sick leave between the



1  
2  
3 intervention group and the control group at 6 and 12 months' follow-up. This is in line with earlier  
4 findings from the same RCT using sick leave data from a national Swedish register including only  
5 spells 15 days and above.<sup>27</sup> Further, there were no significant differences in the subsamples, that is,  
6  
7 among patients highly exposed to stressors.  
8  
9

### 11 12 **Interpretation of findings**

13  
14 In this study, sick leave is used as an outcome measure, as it is considered a useful integrated  
15 measure of physical, psychological and social functioning in studies of working populations.<sup>9</sup>  
16  
17 However, the relationship between ill health and sick leave is complex,<sup>7,29</sup> since it includes absence  
18 from work that is attributed to sickness by the employee and accepted as such by the employer<sup>5</sup> and  
19 other actors. To some extent, sick leave reflects employees' perceptions of their health and their  
20 behaviour in response to ill health.<sup>9</sup> Ill health can therefore be treated as a prerequisite of sick leave  
21 seen in relation to conditions within and outside of work.<sup>30</sup> Thus, previous intervention studies on  
22 sick leave have not demonstrated any effect on sick leave.<sup>31-33</sup> Further, short-term sick leave is  
23 considered to be more influenced by social, legal and psychological factors than health compared to  
24 long-term sick leave.<sup>8,9</sup> An essential component of the brief intervention was the discussion of  
25 relevant preventive measures during consultation. In general, GPs regard sickness certification as a  
26 powerful and important tool.<sup>34</sup> In addition, workers use sick leave as a form of self-medication and a  
27 preventive measure when perceiving strain at work.<sup>35</sup> Hence, the brief intervention might have  
28 contributed to GPs and patients using short-term sick leave as an early treatment and as a preventive  
29 measure to a higher extent than otherwise. Since sick leave is used both as an indicator for ill health  
30 and as a tool for treatment of ill health, an initial reduction in sick leave might not be a positive  
31 outcome of the brief intervention. This complexity might be a reason why the number of sick leave  
32 days was not lower for the intervention group than the control group.  
33  
34  
35  
36  
37  
38  
39  
40  
41  
42  
43  
44  
45  
46  
47  
48  
49  
50  
51  
52  
53

54  
55 The layout of the brief intervention is fundamental for the results retrieved. The first and  
56 perhaps foremost aspect of the intervention was to increase the GPs' knowledge and awareness  
57 about work-related stress, but the training session received might not have been exhaustive enough  
58  
59  
60

1  
2  
3 to raise GPs' attention to patients with work-related problems or lead them to address such a  
4  
5 complex health issue.<sup>36 37</sup> Secondly, filling in the WSQ was expected to increase the patients'  
6  
7 awareness about their symptoms being stress-related. The use of patient-reported outcome  
8  
9 measures has indeed been shown to improve the understanding of symptoms and facilitate  
10  
11 communication.<sup>38 39</sup> However, early in the clinical reasoning process patients could be in need of  
12  
13 rapport building and exclusion of physical diseases and consequently resist a psychiatric  
14  
15 explanation.<sup>40</sup> Thirdly, receiving feedback on WSQ results was hypothesised to increase patients'  
16  
17 motivation to address their work situation. However, the link between antecedents of motivation  
18  
19 and enactment is complex. It is therefore necessary to take, for instance, past behaviour, intention,  
20  
21 perceived behavioural control and outcome expectancy into account<sup>41</sup> to be able to understand this  
22  
23 link. Thus, receiving feedback might not be sufficient to increase motivation to act. Fourthly, the first  
24  
25 three components combined in the brief intervention were assumed to constitute a basis for fruitful  
26  
27 GP–patient discussions and initiating relevant measures. In concordance, collaborations with patients  
28  
29 and colleagues are seen as important elements in the referral process.<sup>42</sup> However, according to GPs,  
30  
31 other aspects such as reluctance to cooperate with patients and sparse contact with colleagues could  
32  
33 affect the referral process<sup>42</sup> and the measures taken. Taken together, factors related to the study  
34  
35 setup might have diluted the effect of the intervention, so that no difference in self-reported sick  
36  
37 leave days was detected, even for the subsamples highly exposed to stressors.  
38  
39  
40  
41  
42

43 The last step of the brief intervention, that is, discussing measures, was left for the GPs to  
44  
45 organise as they deemed fit, rather than being specified in the study protocol. In general, GPs have a  
46  
47 common understanding of their practice arising not only from the field of general practice but also  
48  
49 from the mission of the Swedish primary health care system.<sup>19</sup> The overall way of working would  
50  
51 therefore be similar. However, the results from a process evaluation of this RCT (Hultén, Dahlin-  
52  
53 Ivanoff, Holmgren. Positioning work-related stress: GPs' reasoning about using the WSQ combined  
54  
55 with feedback at consultation, in preparation) indicate that the prerequisites for discussing measures  
56  
57 might not have been ideal. The brief intervention was not found to assist the GPs in their work, since  
58  
59  
60

1  
2  
3 it could alter their already well-functioning work procedure. This confirms previous findings, where  
4 the use of instruments to obtain a quantitative score of depression was not perceived as useful by  
5 GPs.<sup>43</sup> The process evaluation also showed that the GPs could find it difficult to interpret and act on  
6 the results from the WSQ and could even question their responsibility for prevention of patients' ill  
7 health due to work-related stress, when resources were sparse. The intervention might therefore not  
8 have been efficient enough to add any effect on the days of sick leave at the follow-ups. Further,  
9 these aspects might have diminished the differences in measures taken between the intervention  
10 group and the control groups.  
11  
12  
13  
14  
15  
16  
17  
18  
19

### 20 21 **Strengths and limitations**

22  
23 Few RCTs in primary health care have focused on patients' sick leave.<sup>31-33</sup> In some respects, this study  
24 can be considered as pragmatic, since it is designed to test the impact of the brief intervention on  
25 sick leave in clinical practice. Inherent in pragmatic trials is a significant heterogeneity concerning  
26 patients, treatments and clinical settings, which leads to dilution of the effect of the intervention.<sup>44</sup>  
27  
28 Consequently, pragmatic trials must be large. The lack of statistical difference between the  
29 intervention group and the control group could therefore be caused by a lack of statistical power due  
30 to a small sample size. The trial also included aspects of explanatory trials, that is, trials that aim to  
31 evaluate the efficacy of an intervention in a well-defined and controlled setting,<sup>44</sup> as extra personnel  
32 administered parts of the intervention. Otherwise, the study would not have been feasible. As a  
33 result, the generalisability and application in routine practice settings decreased.  
34  
35  
36  
37  
38  
39  
40  
41  
42  
43  
44  
45

46 To find the patients at risk of sick leave due to work-related stress, the inclusion criteria had to  
47 be wide. The target group of the study might have included patients not perceiving work-related  
48 stress, that is, patients not in need of the intervention. Apart from the main analysis, additional  
49 analyses were therefore performed for five subsamples with patients highly exposed to stressors.  
50  
51 However, the sample size and power thereby decreased.  
52  
53  
54  
55

56  
57 The choice of outcome measures has to be taken into consideration. There are different  
58 methodological aspects and approaches to consider in using sick leave data in research,<sup>45</sup> Spell  
59  
60

1  
2  
3 measures, person measures and time-based measures have to be used wisely<sup>45</sup> to capture any  
4 differences between the intervention group and the control group. Therefore, both the self-reported  
5 gross sick leave days and net sick leave days were used as outcome measures in this study. However,  
6 other outcome measures describing sick leave, such as not only number of days from intervention to  
7 sick leave but also health-related measures, might have been needed to capture an effect of the  
8 intervention.  
9

10  
11  
12  
13  
14  
15  
16 The use of self-reported sick leave data was considered as a reasonable choice, as it made it  
17 possible to account for the first two weeks of sick leave. Thereby, any short periods of sick leave  
18 initiated by the workers themselves<sup>35</sup> or by the GPs were included. Even so, self-reported data can be  
19 afflicted with recall bias. However, earlier studies indicate that there is good agreement between  
20 self-reported data and register information.<sup>46 47</sup> Even though the response rate was high, data were  
21 missing. Non-responders had to be accounted for, as this could affect the validity of trial findings.<sup>48</sup>  
22 Multiple imputation of missing data was not possible, since the data were not normally distributed.  
23 In addition, simple imputation, such as last value carried forward, was found to be inappropriate, as  
24 it assumes a strong correlation between a prior and a later value. Since there were no statistically  
25 significant differences in characteristics between responders at baseline and at follow-up, using not  
26 imputed data for responders at 6 and 12 months' follow-up for the main analysis was considered the  
27 best option. In addition, analysing sick leave data can be challenging, as it is not normal distributed.<sup>45</sup>  
28 Non-parametric tests, generally with less power, were therefore used in this study. The relatively  
29 small sample size and the statistical methods used both contributed to lowering the power. Thus, it is  
30 not possible to know whether the intervention had no effect or if it was not possible to detect an  
31 effect.  
32  
33  
34  
35  
36  
37  
38  
39  
40  
41  
42  
43  
44  
45  
46  
47  
48  
49  
50  
51  
52  
53

### 54 **Conclusions and implications**

55  
56 Based on the results from this RCT, the brief intervention showed no effect on the number of self-  
57 reported sick leave days. However, the study yielded information about the provision of  
58  
59  
60

1  
2  
3 interventions in primary health care. When performing RCTs in primary health care settings, the  
4 design is determined by what is regarded as viable. Contextual aspects such as adapted educational  
5 efforts on different levels, the patients' needs and GPs' attitudes to the intervention have to be  
6 considered thoroughly when developing and implementing interventions on preventing sick leave  
7 due to work-related stress. In addition, the results can lead to discussions about how to use sick  
8 leave as an outcome measure. Even so, there is a significant need for further research into these  
9 issues, given the individual and societal consequences of ill health due to work-related stress and the  
10 limited resources to provide treatment in a cost-effective way.  
11  
12  
13  
14  
15  
16  
17  
18  
19  
20  
21

## 22 **DECLARATIONS**

23  
24  
25 **Acknowledgements** The authors would like to acknowledge the PHCCs and especially the GPs and  
26 patients taking part in this study as well as the co-workers in the research group TIDAS for their  
27 support and feedback.  
28  
29  
30  
31

32  
33  
34 **Contributors** KH is the principal investigator and in charge of the RCT. KH was involved in designing  
35 the RCT and applying for funding. Statistical analysis was performed by AMH in close collaboration  
36 with PB. AMH drafted the manuscript, which was edited by KH and PB. All three authors critically  
37 reviewed and approved the final version of the manuscript.  
38  
39  
40  
41  
42  
43

44 **Funding** This study was funded by the Swedish Research Council for Health, Working Life and  
45 Welfare (2014-0936).  
46  
47  
48  
49

50 **Disclaimer** The Swedish Research Council for Health, Working Life and Welfare had no role in the  
51 design of the study, data collection, analysis or interpretation of data, or in writing the manuscript.  
52  
53  
54

55  
56 **Competing interests** The authors declare that they have no competing interests.  
57  
58  
59

60 **Patient consent for publication** Not required.

1  
2  
3 **Ethical approval** The project received ethical approval, reference number 125–15, from the Regional  
4  
5 Ethical Review Board in Gothenburg, Sweden.  
6  
7

8 **Data availability statement** For ethical reasons the datasets generated and analysed during the  
9  
10 current study are not publicly available, but they are available from the corresponding author on  
11  
12 reasonable request.  
13  
14

15  
16 **Word count** 4152 (Introduction, Method, Results, Discussion and Conclusions and implications)  
17

18  
19 **License statement** Other than as permitted in any relevant BMJ Author's Self Archiving Policies, I  
20  
21 confirm this Work has not been accepted for publication elsewhere, is not being considered for  
22  
23 publication elsewhere and does not duplicate material already published. I confirm all authors  
24  
25 consent to publication of this Work and authorise the granting of this licence  
26  
27  
28

## 29 30 REFERENCES

- 31  
32 1. Mather L, Bergström G, Blom V, et al. High job demands, job strain, and iso-strain are risk factors  
33  
34 for sick leave due to mental disorders a prospective Swedish twin study with a 5-year follow-  
35  
36 up. *J Occup Environ Med* 2015;57(8):858-65.  
37  
38 2. Da Costa BR, Vieira ER. Risk factors for work-related musculoskeletal disorders: A systematic  
39  
40 review of recent longitudinal studies. *Am J Ind Med* 2010;53(3):285-323.  
41  
42 3. Socialförsäkringen i siffror 2019 [Social Insurance in Figures 2019]. Stockholm: The Swedish Social  
43  
44 Insurance Agency, 2019.  
45  
46 4. Sjukskrivning för reaktioner på svår stress ökar mest [Sick leave for reactions to severe stress  
47  
48 increases most]. Stockholm: The Swedish Social Insurance Agency, 2016.  
49  
50 5. Whitaker SC. The management of sick leave. *Occup Environ Med* 2001;58(6):420-24.  
51  
52 6. Allebeck P, Mastekaasa A. Chapter 3. Causes of sick leave: Research approaches and explanatory  
53  
54 models. *Scand J Public Health Suppl* 2004;32(63):36-43.  
55  
56  
57  
58  
59  
60

- 1  
2  
3 7. Kangas M, Muotka J, Huhtala M, et al. Is the Ethical Culture of the Organization Associated with  
4  
5 Sick leave? A Multilevel Analysis in a Public Sector Organization. *J Bus Ethics* 2017;140(1):131-  
6  
7 45.  
8  
9
- 10 8. Aaviksoo E, Kiivet RA. Influence of the sickness benefit reform on sick leave. *Health policy*  
11  
12 2016;120(9):1070-78.  
13
- 14 9. Marmot M, Feeney A, Shipley M, et al. Sick leave as a measure of health status and functioning:  
15  
16 From the UK Whitehall II study. *J Epidemiol Community Health* 1995;49(2):124-30.  
17
- 18 10. Kivimäki M, Forma P, Wikström J, et al. Sick leave as a risk marker of future disability pension: The  
19  
20 10-town study. *J Epidemiol Community Health* 2004;58(8):710-11.  
21  
22
- 23 11. Hultin H, Lindholm C, Malfert M, et al. Short-term sick leave and future risk of sick leave and  
24  
25 unemployment - The impact of health status. *BMC Public Health* 2012;12(1).  
26  
27
- 28 12. Bakker AB, Demerouti E, de Boer E, et al. Job demand and job resources as predictors of absence  
29  
30 duration and frequency. *J Vocat Behav* 2003;62(2):341-56.  
31
- 32 13. Holmgren K, Hensing G, Dellve L. The association between poor organizational climate and high  
33  
34 work commitments, and sick leave in a general population of women and men. *J Occup*  
35  
36 *Environ Med* 2010;52(12):1179-85.  
37  
38
- 39 14. Kant I, Jansen NWH, Van Amelsvoort LGPM, et al. Structured early consultation with the  
40  
41 occupational physician reduces sick leave among office workers at high risk for long-term sick  
42  
43 leave: A randomized controlled trial. *J Occup Rehabil* 2008;18(1):79-86.  
44  
45
- 46 15. Boersma K, Linton SJ. Screening to identify patients at risk: Profiles of psychological risk factors  
47  
48 for early intervention. *Clin J Pain* 2005;21(1):38-43.  
49
- 50 16. God och nära vård – En primärvårdsreform [Good quality, local health care – A primary care  
51  
52 reform]. Swedish Government Official Reports, SOU 2018:39. Stockholm: Government  
53  
54 Offices of Sweden, Ministry of Health and Social Affairs, 2018.  
55  
56 <https://data.riksdagen.se/fil/FD4442D3-C4D5-4799-869C-A00930A003F5>  
57  
58  
59  
60

- 1  
2  
3 17. Lykkegaard J, Rosendal M, Brask K, et al. Prevalence of persons contacting general practice for  
4  
5 psychological stress in Denmark. *Scand J Prim Health Care* 2018;36(3):272-80.  
6
- 7 18. Lofgren A, Hagberg J, Arrelöv B, et al. Frequency and nature of problems associated with sickness  
8  
9 certification tasks: a cross-sectional questionnaire study of 5455 physicians. *Scand J Prim*  
10  
11 *Health Care* 2007;25(3):178-85.  
12
- 13 19. Primärvårdens uppdrag : en kartläggning av hur landstingens uppdrag till primärvården är  
14  
15 formulerade. Stockholm: The National Board of Health and Welfare, 2016.  
16
- 17 20. Anell A. The public-private pendulum-patient choice and equity in Sweden. *New Engl J Med*  
18  
19 2015;372(1):1-4.  
20  
21
- 22 21. Stureson M, Edlund C, Fjellman-Wiklund A, et al. Work ability as obscure, complex and unique:  
23  
24 Views of Swedish occupational therapists and physicians. *Work* 2013;45(1):117-28.  
25
- 26 22. Nilsing E, Söderberg E, Berterö C, et al. Primary healthcare professionals' experiences of the sick  
27  
28 leave process: A focus group study in Sweden. *J Occup Rehabil* 2013;23(3):450-61.  
29
- 30 23. Carlsson L, Lännerström L, Wallman T, et al. General practitioners' perceptions of working with  
31  
32 the certification of sick leaves following changes in the Swedish social security system: A  
33  
34 qualitative focus-group study. *BMC Fam Pract* 2015;16(1)  
35  
36
- 37 24. Holmgren K, Hensing G, Dahlin-Ivanoff S. Development of a questionnaire assessing work-related  
38  
39 stress in women - Identifying individuals who risk being put on sick leave. *Disabil Rehabil*  
40  
41 2009;31(4):284-92.  
42  
43
- 44 25. Frantz A, Holmgren K. The Work Stress Questionnaire (WSQ) - Reliability and face validity among  
45  
46 male workers. *BMC Public Health* 2019;19(1).  
47
- 48 26. Holmgren K, Sandheimer C, Mardby AC, et al. Early identification in primary health care of people  
49  
50 at risk for sick leave due to work-related stress - study protocol of a randomized controlled  
51  
52 trial (RCT). *BMC Public Health* 2016;16(1):1193.  
53  
54  
55  
56  
57  
58  
59  
60



- 1  
2  
3 27. Holmgren K, Hensing G, Bültmann U, et al. Does early identification of work-related stress,  
4  
5 combined with feedback at GP-consultation, prevent sick leave in the following 12 months? a  
6  
7 randomized controlled trial in primary health care. *BMC Public Health* 2019;19(1):1110.  
8  
9
- 10 28. Social insurance in Sweden. Stockholm: Government Offices of Sweden, Ministry of Health and  
11  
12 Social Affairs, 2016.  
13  
14 <https://www.government.se/495457/globalassets/government/dokument/socialdeparteme>  
15  
16 [ntet/socialinsuranceinsweden\\_august-2016.pdf](https://www.government.se/495457/globalassets/government/dokument/socialdepartementet/socialinsuranceinsweden_august-2016.pdf)  
17  
18
- 19 29. Kaiser CP. What do we know about employee absence behavior? An interdisciplinary  
20  
21 interpretation. *J Socio-Econ* 1998;27(1):79-96.  
22
- 23 30. Johansson G, Lundberg I. Adjustment latitude and attendance requirements as determinants of  
24  
25 sick leave or attendance. Empirical tests of the illness flexibility model. *Soc Sci Med*  
26  
27 2004;58(10):1857-68.  
28
- 29 31. Kaldo V, Lundin A, Hallgren M, et al. Effects of internet-based cognitive behavioural therapy and  
30  
31 physical exercise on sick leave and employment in primary care patients with depression:  
32  
33 Two subgroup analyses. *Occup Environ Med* 2018;75(1):52-58.  
34  
35
- 36 32. Wikberg C, Westman J, Petersson EL, et al. Use of a self-rating scale to monitor depression  
37  
38 severity in recurrent GP consultations in primary care - does it really make a difference? A  
39  
40 randomised controlled study.(Report). *BMC Fam Pract* 2017;18(1).  
41  
42
- 43 33. Rantonen J, Karppinen J, Vehtari A, et al. Effectiveness of three interventions for secondary  
44  
45 prevention of low back pain in the occupational health setting - A randomised controlled trial  
46  
47 with a natural course control. *BMC Public Health* 2018;18(1)  
48  
49
- 50 34. MacDonald S, Maxwell M, Wilson P, et al. A powerful intervention: General practitioners'; Use of  
51  
52 sickness certification in depression. *BMC Fam Pract* 2012;13(1):82.  
53  
54
- 55 35. Danielsson L, Elf M, Hensing G. Strategies to keep working among workers with common mental  
56  
57 disorders—a grounded theory study. *Disabil Rehabil* 2019;41(7):786-95.  
58  
59  
60

- 1  
2  
3 36. Rankin L, Fowler CJ, Stålnacke BM, et al. What influences chronic pain management? A best-  
4  
5 worst scaling experiment with final year medical students and general practitioners. *Br J Pain*  
6  
7 2019;13(4):214-25.  
8  
9  
10 37. de Kock CA, Lucassen PLBJ, Bor H, et al. Training GPs to improve their management of work-  
11  
12 related problems: Results of a cluster randomized controlled trial. *Eur J Gen Pract*  
13  
14 2018;24(1):258-65.  
15  
16 38. Wikberg C, Pettersson A, Westman J, et al. Patients' perspectives on the use of the Montgomery-  
17  
18 Asberg depression rating scale self-assessment version in primary care. *Scand J Prim Health*  
19  
20 *Care* 2016;34(4):434-42.  
21  
22  
23 39. Talib TL, DeChant P, Kean J, et al. A qualitative study of patients' perceptions of the utility of  
24  
25 patient-reported outcome measures of symptoms in primary care clinics. *Quality of Life*  
26  
27 *Research* 2018;27(12):3157-66.  
28  
29  
30 40. Lampe L, Shadbolt N, Starcevic V, et al. Diagnostic processes in mental health: GPs and  
31  
32 psychiatrists reading from the same book but on a different page. *Australas Psychiatry*  
33  
34 2012;20(5):374-78.  
35  
36 41. Hagger MS, Chatzisarantis NLD. Integrating the theory of planned behaviour and self-  
37  
38 determination theory in health behaviour: A meta-analysis. *Br J Health Psychol*  
39  
40 2009;14(2):275-302.  
41  
42  
43 42. Thorsen O, Hartveit M, Johannessen JO, et al. Typologies in GPs' referral practice. *BMC Fam Pract*  
44  
45 2016;17(1).  
46  
47  
48 43. Pettersson A, Björkelund C, Petersson E. To score or not to score: A qualitative study on GPs  
49  
50 views on the use of instruments for depression. *Fam Pract* 2014;31(2):215-21.  
51  
52 44. Patsopoulos NA. A pragmatic view on pragmatic trials. *Dialogues Clin Neurosci* 2011;13(2):217.  
53  
54 45. Hensing G, Alexanderson K, Bjurulf P, et al. How to measure sick leave? Literature review and  
55  
56 suggestion of five basic measures. *Scand J Public Health* 1998;26(2):133-44.  
57  
58  
59  
60

- 1  
2  
3 46. Voss M, Stark S, Alfredsson L, et al. Comparisons of self-reported and register data on sick leave  
4  
5 among public employees in Sweden. *Occup Environ Med* 2008;65(1):61-67.  
6  
7  
8 47. Thorsen SV, Flyvholm MA, Bültmann U. Self-reported or register-based? A comparison of sick  
9  
10 leave data among 8110 public and private employees in Denmark. *Scand J Work Environ*  
11  
12 *Health* 2018;44(6):631-38.  
13  
14 48. Liao JM, Stack CB. Annals understanding clinical research: Implications of missing data due to  
15  
16 dropout. *Ann Intern Med* 2017;166(8):596-98.  
17  
18  
19  
20  
21  
22  
23  
24  
25  
26  
27  
28  
29  
30  
31  
32  
33  
34  
35  
36  
37  
38  
39  
40  
41  
42  
43  
44  
45  
46  
47  
48  
49  
50  
51  
52  
53  
54  
55  
56  
57  
58  
59  
60

For peer review only

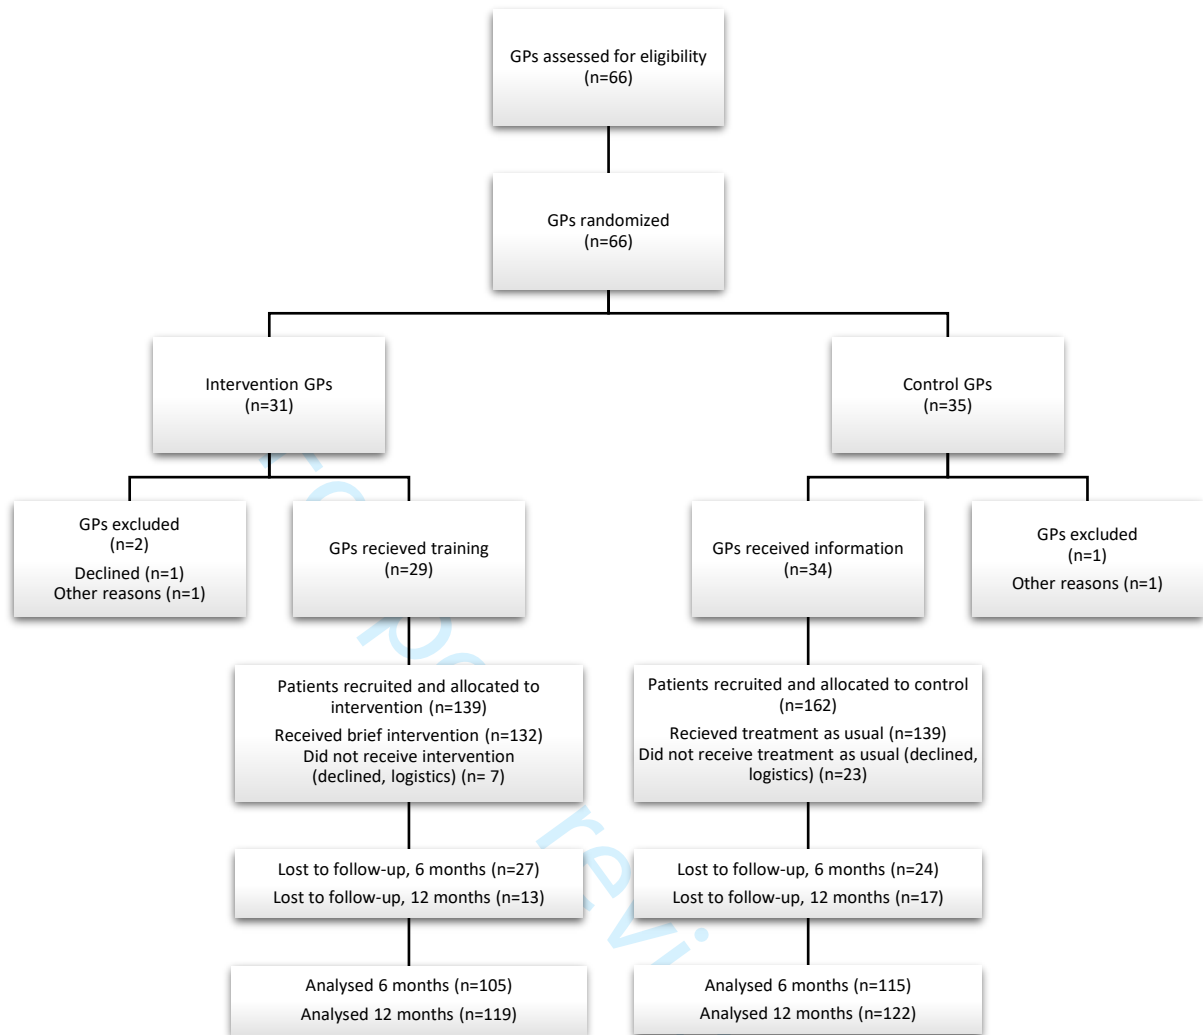

1  
2  
3  
4  
5  
6  
7  
8  
9  
10  
11  
12  
13  
14  
15  
16  
17  
18  
19  
20  
21  
22  
23  
24  
25  
26  
27  
28  
29  
30  
31  
32  
33  
34  
35  
36  
37  
38  
39  
40  
41  
42  
43  
44  
45  
46  
47  
48  
49  
50  
51  
52  
53  
54  
55  
56  
57  
58  
59  
60

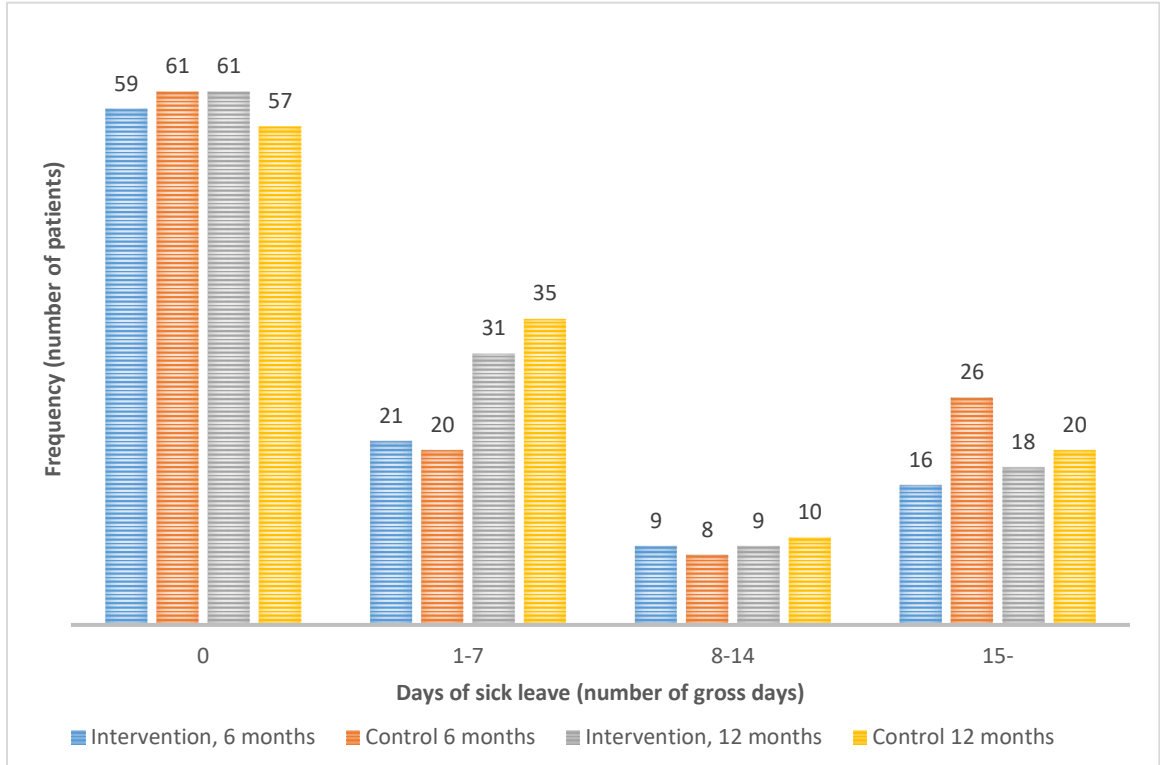

review only

## STUDY PROTOCOL

## Open Access

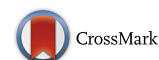

# Early identification in primary health care of people at risk for sick leave due to work-related stress – study protocol of a randomized controlled trial (RCT)

Kristina Holmgren<sup>1,2\*</sup> , Christine Sandheimer<sup>2</sup>, Ann-Charlotte Mårdby<sup>3,4</sup>, Maria E. H. Larsson<sup>1,5</sup>, Ute Bültmann<sup>6</sup>, Dominique Hange<sup>7</sup> and Gunnel Hensing<sup>2</sup>

## Abstract

**Background:** Early identification of persons at risk of sickness absence due to work-related stress is a crucial problem for society in general, and primary health care in particular. To date, no established method to do this exists. This project's aim is to evaluate whether systematic early identification of work-related stress can prevent sickness absence. This paper presents the study design, procedure and outcome measurements, as well as allocation and baseline characteristics of the study population.

**Method/design:** The study is a two-armed randomized controlled trial with follow-up at 3, 6 and 12 months. Non-sick-listed employed women and men, aged 18 to 64 years, who had mental and physical health complaints and sought care at primary health care centers (PHCC) were eligible to participate. At baseline work-related stress was measured by the Work Stress Questionnaire (WSQ), combined with feedback at consultation, at PHCC. The preventive intervention included early identification of work-related stress by the WSQ, GP training in the use of WSQ, GP feedback at consultation and finding suitable preventive measures. A process evaluation was used to explore how to facilitate future implementation and structural use of the WSQ at the PHCC. The primary outcome to compare the preventive sick leave intervention by the general practitioner (GP) versus treatment as usual is sick leave data obtained from the Swedish Social Insurance Agency register.

**Discussion:** Early screening for sick leave due to work-related stress makes it possible not only to identify those at risk for sick leave, but also to put focus on the patient's specific work-related stress problems, which can be helpful in finding suitable preventive measures. This study investigates if use of the WSQ by GPs at PHCCs, combined with feedback at consultation, prevents future sickness absence.

**Trial registration:** ClinicalTrials.gov. Identifier: NCT02480855. Registered 20 May 2015

**Keywords:** Psychosocial work factors, Work Stress Questionnaire (WSQ), Intervention, Organizational climate, Work commitment

\* Correspondence: kristina.holmgren@neuro.gu.se

<sup>1</sup>Department of Health and Rehabilitation, Institute of Neuroscience and Physiology, The Sahlgrenska Academy at the University of Gothenburg, Gothenburg, Sweden

<sup>2</sup>Section for Epidemiology and Social Medicine, Institute of Medicine, the Sahlgrenska Academy at the University of Gothenburg, Gothenburg, Sweden  
Full list of author information is available at the end of the article

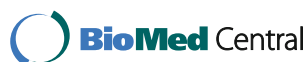

© The Author(s). 2016 **Open Access** This article is distributed under the terms of the Creative Commons Attribution 4.0 International License (<http://creativecommons.org/licenses/by/4.0/>), which permits unrestricted use, distribution, and reproduction in any medium, provided you give appropriate credit to the original author(s) and the source, provide a link to the Creative Commons license, and indicate if changes were made. The Creative Commons Public Domain Dedication waiver (<http://creativecommons.org/publicdomain/zero/1.0/>) applies to the data made available in this article, unless otherwise stated.

## Background

Work-related stress is common in many European countries, with Sweden representing the highest level of reported work stress in Europe [1, 2]. A number of organizational and psychosocial work-related factors are found to be associated with stress, which in turn might result in adverse health effects and illness, and a higher risk of sick leave. Work-related factors, such as poor organizational climate, in terms of intolerance at work [3, 4], conflicts [5, 6], and injustice at work [7] are associated with stress, poor health and subsequent sick leave. Being engaged in work or committed to work is basically considered to have a positive influence on both the individuals' well-being and that of the organization [8, 9]. It has been demonstrated, though, that being too engaged, or over-committed, is a risk factor for sickness presenteeism [10], work-related stress [11] and poor health [12]. These organizational and psychosocial working life stressors and strains affect people negatively and result in various mental and physical health complaints, even prior to sick-listing [13–15]. People with these complaints often consult their primary health care physician [16–18] long before they even contemplate taking sick leave [11, 19]. It may well be that neither the patient, nor the general practitioner (GP) is aware that their symptoms could be caused by organizational and psychosocial factors at work. Because many patients might be at risk of disability and long-term sick leave, it is of immense value to identify these persons early and to take preventive actions [20].

Providing sickness certificates is a common task for GPs in Sweden [21, 22]. One third of Swedish GPs reported having 1–5 consultations each per week concerning sick leave [21]. This indicates that they often deal with assessing level of patients' work incapacity in their everyday practice [21, 23]. GPs often found the decision about issuing a sickness certificate difficult, especially if the patients describe symptoms without clinical findings [21, 24]. Likewise, GPs stated that they had poor knowledge of the workplace environment and the labor market [23, 25], and they reported that they barely talked to patients about their work situation [26, 27]. Today, GPs have no established practice for early identification of patients at risk for sick leave caused by adverse psychosocial factors.

The Work Stress Questionnaire (WSQ) has been designed specifically for early identification of people at risk for sick leave due to work-related stress, and was developed in the context of primary health care [11, 19, 28]. The WSQ is based on the idea that personal characteristics and environmental factors are interdependent, and that changes in either of these influences the possibilities for a sustainable work performance [29–32]. Experiences from sick-listed people [11] contributed to the questionnaire development, and showed that a poor organizational climate, as exemplified by indistinct leadership and conflicts at

work, in combination with high work commitment, such as excessive individual demands and responsibility, was crucial for future sick-listing [11]. A prospective Swedish primary health care study [19] found that high stress due to poor organizational climate at baseline, measured with the WSQ, more than doubled the risk for sick leave at follow-up. Combined with high stress due to high work commitment the risk for sick leave increased fourfold.

Early screening makes it possible not only to identify patients at risk for sick leave but also to identify the patient's specific problems, which makes for the use of preventive measures and efficient treatment [33]. During the patient–GP consultation, tailored preventive measures for work-related stress can be suggested that might lower the risk of future sick leave. Since the WSQ takes both work-related factors and personal characteristics into account, it is possible to identify work-related stress from both an environmental and a personal perspective. Thus, the WSQ gives the GP the opportunity to direct preventive measures towards either the person or the workplace, or both. Therefore, it is important in GP practice to identify the patient's specific problems at work early, to communicate them to the patient, and to recommend suitable preventive measures.

## Aims and hypothesis

The overall aim of this randomized controlled trial (RCT) is to evaluate whether systematic use of the WSQ, combined with feedback at consultation, can serve as a method for health care professionals in primary health care centers (PHCCs) to prevent or reduce sick leave due to work-related stress during a 12-month follow-up period. The preventive intervention will be compared versus treatment as usual (TAU). The aim is also to evaluate whether there are differences between the intervention group and the control group in healthcare measures and the prescribed medications at follow-up. In a process evaluation, the systematic use of the WSQ combined with feedback at consultation is examined.

The hypothesis of this RCT is that patients who answer the WSQ, when combined with feedback at GP consultation, will have fewer sick leave days during the year after intervention compared with those who receive TAU.

This paper presents the study design, the procedure, the outcome measurements, the allocation and the baseline characteristics of the study population. The project is still ongoing, with follow-up data to be collected and analyzed to be done. The RCT was designed in accordance with CONSORT recommendations [34].

## Method and design

### Study context

In Sweden, the social insurance scheme provides benefits to people who cannot work because of disease or injury.

Those gainfully employed are covered for the first 14 days (except for one qualification day) by their employer, and after that period benefits are granted from the Social Insurance Agency. From day 8, a medical certificate is required. Providing sickness certificates is a common task for GPs in Sweden [21, 22]. This study is conducted in PHCCs in the Västra Götaland region with a population of 1.6 million inhabitants, around 17% of the Swedish population. The region has approximately 200 public and private PHCCs with approximately 800 employed GPs.

This RCT study is part of the TIDAS project within the New Ways research program at the Section for Epidemiology and Social Medicine, Institute of Medicine, Sahlgrenska Academy, University of Gothenburg.

### Study design and recruitment

This study was designed as a two-armed RCT for early identification of people at risk for sick leave due to work-related stress consulting PHCCs. The recruitment of PHCCs took place from May 2015 to November 2015. Out of the Västra Götaland region's 200 PHCCs, 51 public and private PHCCs located in rural and urban areas in and around Gothenburg were identified and consecutively invited to participate. In all, seven PHCCs (four public and three private) participated. The PHCCs were economically compensated for each participant recruited.

### Randomization

GPs and residents who worked in the clinic at participating PHCCs at least 50% of the time were randomized to either the intervention or the control group. The names of all GPs at the participating PHCC were written on slips of paper that were folded and then mixed in a non-transparent bowl. Colleagues that were not involved in the RCT drew the names one at a time, and the names were alternately included in the intervention or the control group.

### Procedure

Prior to the intervention period, the research team visited the participating PHCC and presented the study procedure. The control GPs were instructed to carry on as usual with their consultations. The intervention GPs received a brief training for the intervention, which included knowledge on the relationship between psychosocial factors at work, stress, health and sickness absence. GPs also received instructions on how to use, operationalize and interpret the WSQ, and on how to give feedback to the participants and refer patients at risk. Both oral and written information on the services of the primary health care specialists and occupational healthcare was presented to the GPs.

### Masking (blinding)

Neither participants nor the GP were blinded to allocation in the RCT because of the nature of the intervention. All participants were given information on the study and signed consent forms before the patient–GP consultations. However, the control GPs were not informed when a patient for consultation was a study participant, and the controls filled in the questionnaires after consultation.

### Eligibility to participate

#### Inclusion criteria

Non-sick-listed employed women and men aged 18 to 64 years who saw a GP at the PHCCs in the Västra Götaland region for mental and/or physical health complaints, including depression, anxiety, musculoskeletal disorders, gastrointestinal, cardiovascular symptoms and other stress-related symptoms were invited [16–18].

#### Exclusion criteria

Patients seeking care for diabetes, urinary tract infections, infections, chronic obstructive lung disease, fractures, lump and spots, allergy and psychiatric diagnoses such as schizophrenia, other psychoses or bipolar diagnoses, as well as medical check-ups were excluded. Pregnant women were also excluded because they might be at risk for pregnancy-related sick leave during the follow-up period. Patients currently on sick leave and those who had been off work for a total of 7 days or more during the last month because of sickness, with or without medical record, were excluded, as well as those with a full or part-time disability pension.

### Sample size

A power calculation was performed to determine the number of participants needed to detect at least a 15% [35] difference between the intervention group and the control group concerning the primary outcome, i.e. the number of registered sick leave days (i.e. >14 days or more) during 12 months after inclusion. With a two-sided test, statistical significance of  $p < 0.05$  and 80% power, at least 135 participants were needed in each group.

### Data collection

Data collection took place over a period of 4–8 weeks per center (except for one center, where the data collection took 12 weeks) from May 2015 until January 2016. During data collection, a research assistant was stationed at the PHCC. The research assistant identified and recruited the eligible participants and gave oral and written information on the study. All participants were also asked to provide informed consent for the study, including linking records to registers during follow-up (Fig. 1).



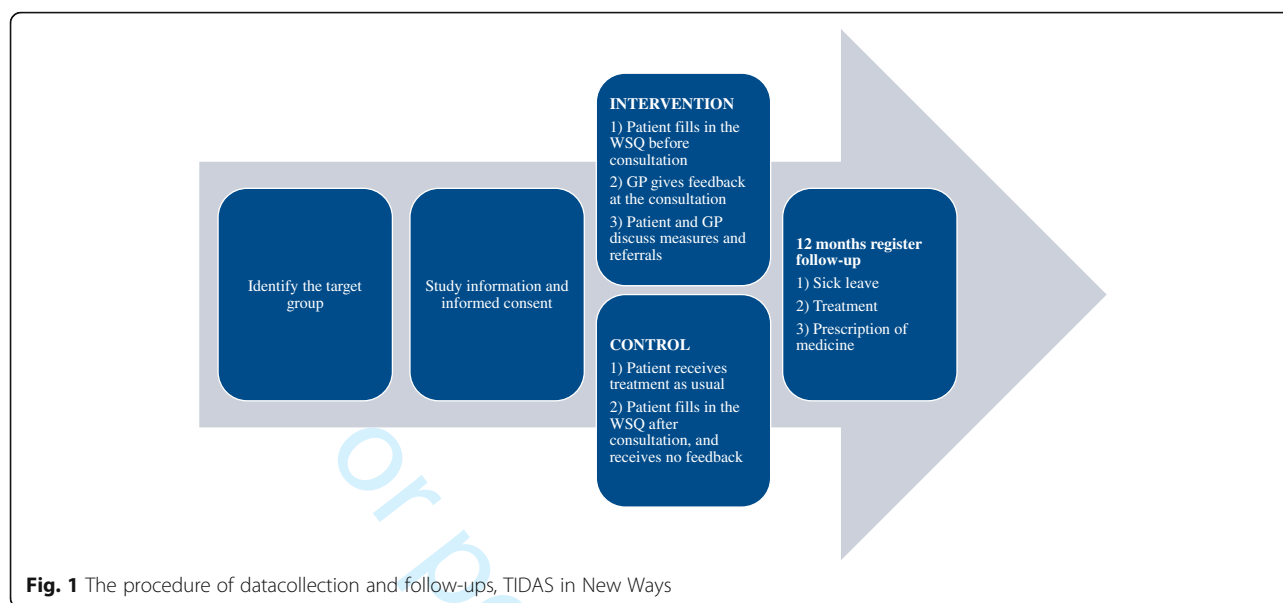

### Intervention group

The intervention consisted of the following components: GPs' brief training in the use of the WSQ, participants' completion of the WSQ, GP feedback at consultation and finding suitable preventive measures. The WSQ consists of 21 main questions grouped into four categories [28]. Two of the categories pertain to perceived stress due to *indistinct organization and conflicts* and perceived stress due to *individual demands and commitment*. Each of these two categories contains seven items. Response options are given on a four-point ordinal scale: 'Not at all stressful', 'Less stressful', 'Stressful', and 'Very stressful'. The other two categories pertain to *influence at work* and *work interference with leisure time*, and contain four and three items, respectively, with response options given on a four-point ordinal scale: 'Yes, always', 'Yes, rather often', 'No, seldom' and 'No, never'. The reliability and face validity of the WSQ has been tested and found to be good [28].

Before the GP consultation, each participant filled in the WSQ and questions on background characteristics, which took around 15 min. The research assistant computed the WSQ and handed over the result to the GP before consultation. At the patient–GP consultation, the GPs were instructed to give feedback to the participant by communicating the results of the WSQ, and discussing possible measures, such as referrals to PHCC's specialists or to the participant's occupational healthcare (Fig. 1).

Directly after each patient–GP consultation, the GP filled in a questionnaire concerning their adherence to the instructions.

### Control group

Control participants received TAU, i.e. an ordinary patient–GP consultation. The GP had no information on

whether the patient was a study participant. After the GP consultation, the participant completed the WSQ and answered questions on background characteristics (Fig. 1).

### Baseline assessments

Self-reported baseline characteristics were collected by questionnaire on gender (female, male), age (years), country of birth (Nordic, other), educational level (compulsory schooling, secondary school education, university or higher education), occupation, employer (private, public, self-employed), employment status (permanent, temporary, self-employed), and the reason for consulting the PHCC (mental and/or physical health complaints).

### Follow-up outcome measurements

All registered data will be collected one year after last inclusion, i.e. January 2017.

### Primary outcome

The number of registered sick leave days (i.e. 14 days or more) and number of absence periods during the 12 months after inclusion covered by sickness benefit will be obtained from the Swedish social insurance agency's Micro Database for Analyzing Social insurance (MiDAS) as well as data on full- and part-time sick leave and sickness and activity compensation.

### Secondary outcome measurements

Short term sick leave (<14 days) and present work status are collected at 3, 6, and 12 months by telephone or email follow-up.

Healthcare measures will be obtained from the Vega database, which covers data on hospital and primary

health care patients in the Västra Götaland region of Sweden. Data concerning diagnoses, number of visits, referrals, and content of consultations and measures during the 12 months following inclusion.

Data on prescribed medications will be obtained from the Swedish Prescribed Drug Register, a national population-based register established in 2005, which contains information on all purchases of prescribed medications in pharmacies [36]. Data concerning the name and amount of purchased medication, date dispensed, and dosage instructions during the 12 months following inclusion.

### Statistical analysis

The analyses will follow the intention-to-treat principle [37]. Per protocol analyses will be conducted to examine if deviations from the protocol have caused bias. Both descriptive and analytic statistics will be used to compare the intervention group and the control group. Analysis will be adjusted for gender and other possible confounders. Sub-group analyses will be done with regard to gender, and if possible given the number of participants, age and diagnostic groups. Non-parametric statistics will be used when ordinal data are analyzed. Otherwise, parametric statistics will be used [37].

### Time plan of the RCT

The enrollment of PHCCs took place from May 2015 to November 2015. The intervention took place between May 2015 and January 2016. Follow-up of sickness absence, healthcare measures and prescribed medications in the registers will be completed one year after last inclusion, i.e. January 2017. Short-term sick leave is followed-up by telephone or e-mail at 3, 6, and 12 months until January 2017.

### Process evaluation, design and procedure

Both qualitative and quantitative methods were used in the process evaluation. The target group of the process evaluation consisted of the intervention GPs. The GPs' considerations on management before, during and after intervention were assessed by questionnaires. Prior to the brief training, the GPs answered questions on readiness to use the WSQ in patient-GP consultation. Directly after each patient-GP consultation, the GP answered questions on adherence to the study protocol. After data collection, the GP answered questions on the feasibility of using the WSQ in patient-GP consultation in daily practice in the future.

After the baseline data collection was completed at each PHCC, all intervention GPs at that particular PHCC were invited to focus group discussions that explored the GPs' perception of the systematic use of the WSQ. Oral and written information was given and informed consent for

the focus group study was provided. The group sessions were held at the PHCC and were moderated by a researcher experienced in focus group methodology. The discussions focused on the following key questions: views on the content of the intervention, how to improve the process, views on the readiness to use the WSQ combined with feedback in daily practice, and how to facilitate future implementation and permanent use of the WSQ at the PHCCs. The group sessions were audio taped, transcribed verbatim and analyzed according to the method of Krueger [38].

### Allocation and baseline characteristics

In total, 66 GPs were randomized to either the intervention group or to the control group. One GP declined participation and two GPs were excluded because of not having the target group at consultation. The intervention group (systematic use of the WSQ and feedback during patient-GP-consulting) consisted of  $n = 29$  GPs and the control group (TAU) of  $n = 34$  GPs (Fig. 2).

During the inclusion period, 301 non-sick-listed employed women and men aged 18 to 64 years who sought care at the seven participating PHCCs in the Västra Götaland region and fulfilled the inclusion criteria were asked to participate in the study. Of these, 20 eligible patients (7%) declined to participate. A total of 10 patients (3%) were excluded because they left the PHCC before being asked to fill in the questionnaires. No statistically significant differences

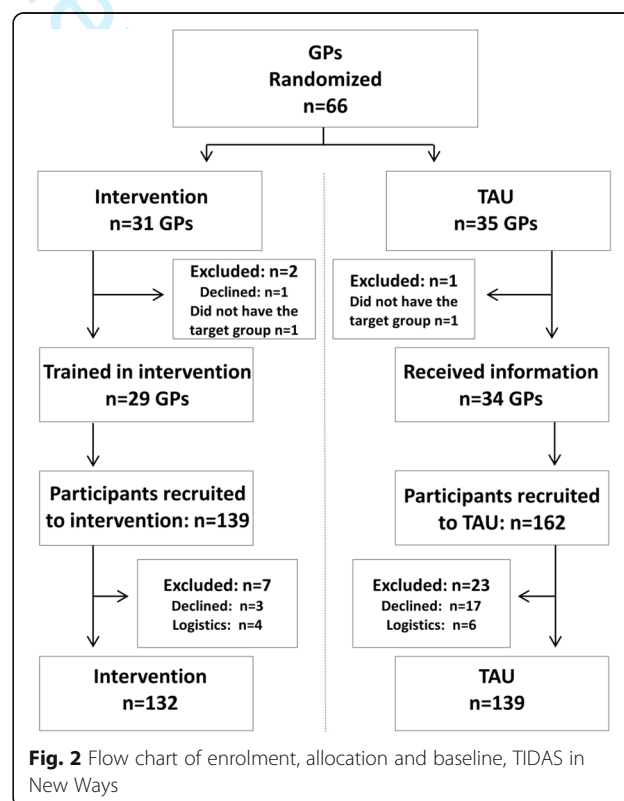

in responses by participant age or gender were found. The final study population consisted of 271 participants (Fig. 2), of which 132 belonged to the intervention group and 139 to the control group.

The mean age was 46 years (standard deviation = 12) in the intervention group and 43 years (standard deviation = 11) in the control group, with a larger proportion in the age group 51–64 among intervention participants. Also, a larger proportion in the intervention group was consulting the PHCC for musculoskeletal reasons. Otherwise, there were no statistically significant differences between the groups in terms of baseline characteristics concerning sociodemographic factors and reasons for consulting the PHCC (Table 1).

## Discussion

There is a high level of sickness absence in Sweden, and stress-inducing factors at work play a large part in the sickness absence rate. Major efforts have been made to reduce sickness absence by restricting the sickness insurance scheme, by introducing monetary incentives to health care providers, and by specific recommended interventions, such as multimodal intervention and behavioral therapy [39]. However, none of these measures had long-term effects [39, 40]. Preventing and reducing sickness absence is challenging, and new measures are needed. Prolonged exposure to adverse psychosocial work conditions can cause stress, which in turn can lead to poor health. This scenario constitutes an obvious risk for people to be sick-listed [41–43]. People turn to their PHCCs to get help. The GPs, though, report little knowledge of work-related factors [21, 24], and rarely talk to their patients about organizational and psychosocial work-related factors [26, 27]. It is, however, essential to identify the patient at risk of being sick-listed at an early stage. This enables the GPs to take appropriate measures preventing health problems and subsequent sick leave. To date, no method exists that can be used in primary health care to identify people at risk for sick-listing due to work-related stress.

Up to now, many interventions have focused on treatment and rehabilitation of individuals already on sick leave. This is very important, but preventing sick leave is better still. Once a person is sick-listed, the return-to-work process is very costly, and this shows that much is to be gained from early identification. The focus of this project very much corresponds to needs expressed by individuals as well as society as a whole. This study is expected to show if early identification of work-related stress, using the WSQ, combined with feedback at consultation, can serve as a method for health care professionals in PHCCs to prevent or reduce sickness absence over a 12-month follow-up.

**Table 1** Characteristics of participants in the intervention and control groups,  $n = 271$ , TIDAS in New Ways

|                                      | Intervention $n = 132$<br>$n^a$ (%) | Control $n = 139$<br>$n^a$ (%) |
|--------------------------------------|-------------------------------------|--------------------------------|
| Gender                               |                                     |                                |
| Female                               | 88 (67)                             | 97 (70)                        |
| Age categories                       |                                     |                                |
| 19–30 years                          | 21 (16)                             | 26 (19)                        |
| 31–50 years                          | 58 (44)                             | 76 (54)                        |
| 51–64 years                          | 53 (40)                             | 37 (27) <sup>c</sup>           |
| Birthplace                           |                                     |                                |
| Nordic countries                     | 122 (93)                            | 125 (90)                       |
| Other                                | 9 (7)                               | 14 (10)                        |
| Educational level                    |                                     |                                |
| Compulsory schooling                 | 13 (10)                             | 15 (11)                        |
| Secondary school                     | 61 (46)                             | 59 (42)                        |
| University or higher                 | 57 (44)                             | 65 (47)                        |
| Occupational class                   |                                     |                                |
| Skilled/unskilled manual             | 49 (37)                             | 58 (42)                        |
| Medium/low non-manual                | 60 (46)                             | 56 (41)                        |
| High-level non-manual                | 23 (17)                             | 24 (17)                        |
| Employer                             |                                     |                                |
| Private                              | 61 (46)                             | 68 (49)                        |
| Public                               | 66 (50)                             | 61 (44)                        |
| Self-employed                        | 5 (4)                               | 9 (7)                          |
| Reason for consultation <sup>b</sup> |                                     |                                |
| Mental or behavioral                 | 75 (57)                             | 69 (50)                        |
| Musculoskeletal                      | 62 (47)                             | 44 (32) <sup>c</sup>           |
| Gastrointestinal                     | 26 (20)                             | 28 (20)                        |
| Cardiovascular                       | 16 (12)                             | 16 (16)                        |
| Other                                | 29 (22)                             | 27 (19)                        |

<sup>a</sup>Dispersed numbers of participants are owing to internal missing data

<sup>b</sup>Multiple responses were optional

<sup>c</sup>Statistically significant differences (tested with the 95% CI for difference in proportion)

Fortunately, we reached our target sample size for participating patients. Also, the fact that few sociodemographic differences were identified between the groups was an advantage. The intervention participants were somewhat older and had a higher rate of musculoskeletal complaints as reasons for consultation. The rates of patients declining and being excluded from participation were low, and no differences concerning gender and age were observed. A limitation is that we did not collect data on non-participation patients' reasons for consultation or reasons to decline participation because of ethical considerations.

The advantages of randomizing at the GP level were considered as twofold: the risk for variations in sociodemographic and socioeconomic factors between participating patients in intervention and controls were reduced, and engaging the whole PHCC to recruit both to intervention and control groups led to more participants attending in earlier studies [44]. The disadvantage of randomizing at the GP level was the risk for contamination, because the GPs might discuss the study procedure with each other. Because the inclusion period was short, and the intervention was brief and imbedded in ordinary daily practice, the contamination risk was considered rather low.

A strength of this project is that both qualitative and quantitative methods were used in the process evaluation. The focus group methodology involves group discussions and is distinguished from other qualitative group interviews by the explicit use of group interaction to collect data on a specific research topic. Communication between the participating focus group members is decisive for the outcome and the group process encourages the participants to clarify not only what they think, but also how and why they think in a certain way [38, 45]. An experienced group leader was chosen to moderate the sessions because the role of the group leader is essential in creating an open and friendly atmosphere that makes participants feel free to express their views [45]. In addition to using the questionnaires on GPs' readiness and feasibility in the process evaluation, they will be analyzed in relation to the outcome variables.

#### Acknowledgements

We would like to thank Robin Fornazar for help with the data management, and Thorbjörn Jonsson for linguistic advice.

#### Funding

This study was funded by the Swedish Research Council for Health, Working Life and Welfare.

#### Availability of data and materials

The datasets generated and analyzed during the current study are not publicly available due ethical grounds but are available from the corresponding author on reasonable request.

#### Authors' contributions

KH is the principal investigator and in charge of the project. KH, A-CM, ML, UB, GH were all involved in designing the RCT and the process evaluation, and applying for funding. KH, CS and DH were primarily responsible for the data collection. KH prepared the initial draft of the manuscript and the other authors contributed. All the authors have critically reviewed and approved the final version of the manuscript.

#### Competing interests

A-CM was employed by Sahlgrenska University Hospital when the study was conducted (1 August 2012 to 22 May 2016) and is currently employed by Novo Nordisk A/S (23 May 2016-ongoing). The authors declare that they have no competing interests.

#### Consent for publication

Not applicable.

#### Ethics approval and consent to participate

Ethical approval was obtained from the Regional Ethical Review Board at the University of Gothenburg, Sweden, with the reference number 125–15. Informed written consent was obtained from all participants and GPs, and both the oral and written information stresses that participation was voluntary and could be terminated without any further consequences. The data is managed carefully, analyses are done only at the group level, and results are presented so that individuals cannot be recognized. The project complies with the ethical principles of the World Medical Association's Declaration of Helsinki.

#### Author details

<sup>1</sup>Department of Health and Rehabilitation, Institute of Neuroscience and Physiology, The Sahlgrenska Academy at the University of Gothenburg, Gothenburg, Sweden. <sup>2</sup>Section for Epidemiology and Social Medicine, Institute of Medicine, the Sahlgrenska Academy at the University of Gothenburg, Gothenburg, Sweden. <sup>3</sup>The Sahlgrenska University Hospital, Gothenburg, Sweden. <sup>4</sup>Novo Nordisk A/S, Box 505875E-202 15 Malmö, Sweden. <sup>5</sup>Närhälsan Research and Development, Primary Health Care, Region Västra Götaland, Sweden. <sup>6</sup>Department of Health Sciences, Community and Occupational Medicine University of Groningen, University Medical Center Groningen, Groningen, The Netherlands. <sup>7</sup>The unit of Primary Health Care, Institute of Medicine, The Sahlgrenska Academy at the University of Gothenburg, Gothenburg, Sweden.

Received: 12 October 2016 Accepted: 17 November 2016

Published online: 25 November 2016

#### References

- de Smet P, Sans S, Dramaix M, Boulenguez C, de Backer G, Ferrario M, et al. Gender and regional differences in perceived job stress across Europe. *Eur J Public Health*. 2005;15(5):536–45.
- Milczarek M, Schneider E, González E. European Agency for Safety and Health at Work. OSH in figures: stress at work – facts and figures. Luxembourg: European Communities; 2009.
- Piirainen H, Rasanen K, Kivimaki M. Organizational climate, perceived work-related symptoms and sickness absence: a population-based survey. *J Occup Environ Med*. 2003;45(2):175–84.
- Arnetz BB, Lucas T, Arnetz JE. Organizational climate, occupational stress, and employee mental health: mediating effects of organizational efficiency. *J Occup Environ Med*. 2011;53(1):34–42.
- Holmgren K, Dahlin-Ivanoff S, Bjorkelund C, Hensing G. The prevalence of work-related stress, and its association with self-perceived health and sick-leave, in a population of employed Swedish women. *BMC Public Health*. 2009;9:73.
- Voss M, Floderus B, Diderichsen F. Physical, psychosocial, and organisational factors relative to sickness absence: a study based on Sweden Post. *Occup Environ Med*. 2001;58(3):178–84.
- Kivimaki M, Elovainio M, Vahtera J, Ferrie JE. Organisational justice and health of employees: prospective cohort study. *Occup Environ Med*. 2003; 60(1):27–33.
- Bakker AB, Schaufeli W, Leiter M, Taris TW. Work engagement: An emerging concept in occupational health psychology. *Work Stress*. 2008;22(3):187–200.
- Bakker AB, Albrecht SL, Leiter MP. Key questions regarding work engagement. *Eur J Work Organ Psy*. 2011;20(1):4–28.
- Love J, Grimby-Ekman A, Eklof M, Hagberg M, Dellve L. "Pushing oneself too hard": performance-based self-esteem as a predictor of sickness presenteeism among young adult women and men—a cohort study. *J Occup Environ Med*. 2010;52(6):603–9.
- Holmgren K, Dahlin IS. Women on sickness absence – views of possibilities and obstacles for returning to work. A focus group study. *Disabil Rehabil*. 2004;26(4):213–22.
- Niedhammer I, Chastang JF, David S, Barouhuel L, Barrandon G. Psychosocial work environment and mental health: Job-strain and effort-reward imbalance models in a context of major organizational changes. *Int J Occup Environ Health*. 2006;12(2):111–9.
- Bultmann U, Huibers MJ, van Amelsvoort LP, Kant I, Kasl SV, Swaen GM. Psychological distress, fatigue and long-term sickness absence: prospective results from the Maastricht Cohort Study. *J Occup Environ Med*. 2005;47(9):941–7.
- Stansfeld SA, Shipley MJ, Head J, Fuhrer R, Kivimaki M. Work characteristics and personal social support as determinants of subjective well-being. *PLoS One*. 2013;8(11):e81115.

15. Tynes T, Johannessen HA, Sterud T. Work-related psychosocial and organizational risk factors for headache: a 3-year follow-up study of the general working population in Norway. *J Occup Environ Med*. 2013;55(12):1436–42.
16. Burton C. Beyond somatisation: a review of the understanding and treatment of medically unexplained physical symptoms (MUPS). *Br J Gen Pract*. 2003;53(488):231–9.
17. Toft T, Fink P, Oernboel E, Christensen K, Frostholm L, Olesen F. Mental disorders in primary care: prevalence and co-morbidity among disorders. results from the functional illness in primary care (FIP) study. *Psychol Med*. 2005;35(8):1175–84.
18. Reid S, Wessely S, Crayford T, Hotopf M. Medically unexplained symptoms in frequent attenders of secondary health care: retrospective cohort study. *BMJ*. 2001;322(7289):767.
19. Holmgren K, Fjallstrom-Lundgren M, Hensing G. Early identification of work-related stress predicted sickness absence in employed women with musculoskeletal or mental disorders: a prospective, longitudinal study in a primary health care setting. *Disabil Rehabil*. 2013;35(5):418–26.
20. Linton SJ, Gross D, Schultz IZ, Main C, Cote P, Pransky G, et al. Prognosis and the identification of workers risking disability: research issues and directions for future research. *J Occup Rehabil*. 2005;15(4):459–74.
21. Lofgren A, Hagberg J, Arrelöv B, Ponzar S, Alexanderson K. Frequency and nature of problems associated with sickness certification tasks: a cross-sectional questionnaire study of 5455 physicians. *Scand J Prim Health Care*. 2007;25(3):178–85.
22. Soderberg E, Alexanderson K. Sickness certificates as a basis for decisions regarding entitlement to sickness insurance benefits. *Scand J Public Health*. 2005;33(4):314–20.
23. Pransky G, Katz JN, Benjamin K, Himmelstein J. Improving the physician role in evaluating work ability and managing disability: a survey of primary care practitioners. *Disabil Rehabil*. 2002;24(16):867–74.
24. Nilsen S, Werner EL, Maeland S, Eriksen HR, Magnussen LH. Considerations made by the general practitioner when dealing with sick-listing of patients suffering from subjective and composite health complaints. *Scand J Prim Health Care*. 2011;29(1):7–12.
25. Nilsing E, Soderberg E, Bertero C, Oberg B. Primary healthcare professionals' experiences of the sick leave process: a focus group study in Sweden. *J Occup Rehabil*. 2013;23(3):450–61.
26. Buijs PC, van Dijk FJ, Buijs PC, van Dijk FJ, Evers M, vd Klink JJ, Anema H. Managing work-related psychological complaints by general practitioners, in coordination with occupational physicians: a pilot study. *Ind Health*. 2007;45(1):37–43.
27. Anema JR, Jettinghoff K, Houtman I, Schoemaker CG, Buijs PC, van den Berg R. Medical care of employees long-term sick listed due to mental health problems: a cohort study to describe and compare the care of the occupational physician and the general practitioner. *J Occup Rehabil*. 2006;16(1):41–52.
28. Holmgren K, Hensing G, Dahlin-Ivanoff S. Development of a questionnaire assessing work-related stress in women - identifying individuals who risk being put on sick leave. *Disabil Rehabil*. 2009;31(4):284–92.
29. Law M, Cooper BA, Strong S, Stewart D, Rigby P, Letts L. The person-environment-occupational model: a transactive approach to occupational performance. *Can J Occup Ther*. 1996;63(1):9–23.
30. Dunn W, Brown C, McGuigan A. The ecology of human performance: a framework for considering the effect of context. *Am J Occup Ther*. 1994;48(7):595–607.
31. Shain M, Kramer DM. Health promotion in the workplace: framing the concept; reviewing the evidence. *Occup Environ Med*. 2004;61(7):643–8. 585.
32. Ilmarinen J. Work ability—a comprehensive concept for occupational health research and prevention. *Scand J Work Environ Health*. 2009;35(1):1–5.
33. Boersma K, Linton SJ. Screening to identify patients at risk: profiles of psychological risk factors for early intervention. *Clin J Pain*. 2005;21(1):38–43.
34. Zwarenstein M, Treweek S, Gagnier JJ, Altman DG, Tunis S, Haynes B, et al. Improving the reporting of pragmatic trials: an extension of the CONSORT statement. *BMJ*. 2008;337:a2390.
35. van Beurden KM, Brouwers EP, Joosen MC, Terluin B, van der Klink JJ, van Weeghel J. Effectiveness of guideline-based care by occupational physicians on the return-to-work of workers with common mental disorders: design of a cluster-randomised controlled trial. *BMC Public Health*. 2013;13:193.
36. Wettermark B, Hammar N, Fored CM, Leimanis A, Otterblad Olausson P, Bergman U, et al. The new Swedish prescribed drug register—opportunities for pharmacoepidemiological research and experience from the first six months. *Pharmacoepidemiol Drug Saf*. 2007;16(7):726–35.
37. Altman D. *Practical statistics for medical research*. Boca Raton: CRC Press; 1999.
38. Krueger RA. *Focus group. A practical guide for applied research*. California: Sage Publications; 1988.
39. Aronsson G, Lundberg U. Rehabilitering och samordning. Ett regeringsuppdrag om att utvärdera, sammanställa och analysera resultat från forskningsprogrammet Rehsam (S2014/5621/SF). Stockholm: FORTE;2015.
40. Ejeby K, Savitskij R, Ost LG, Ekblom A, Brandt L, Ramnerö J, et al. Symptom reduction due to psychosocial interventions is not accompanied by a reduction in sick leave: results from a randomized controlled trial in primary care. *Scand J Prim Health Care*. 2014;32(2):67–72.
41. Mather L, Bergstrom G, Blom V, Svedberg P. High job demands, job strain, and Iso-strain are risk factors for sick leave due to mental disorders: a prospective Swedish twin study with a 5-year follow-up. *J Occup Environ Med*. 2015;57(8):858–65.
42. Theorell T, Hammarstrom A, Gustafsson PE, Magnusson Hanson L, Janlert U, Westerlund H. Job strain and depressive symptoms in men and women: a prospective study of the working population in Sweden. *J Epidemiol Commun H*. 2014;68(1):78–82.
43. Nieuwenhuijsen K, Bruinvels D, Frings-Dresen M. Psychosocial work environment and stress-related disorders, a systematic review. *Occup Med (Lond)*. 2010;60(4):277–86.
44. Mortenius H, Baigi A, Palm L, Fridlund B, Bjorkelund C, Hedberg B. Impact of the organisational culture on primary care staff members' intention to engage in research and development. *J Health Organ Manag*. 2015;29(2):234–51.
45. Dahlin Ivanoff S, Hultberg J. Understanding the multiple realities of everyday life: basic assumptions in focus-group methodology. *Scand J Occup Ther*. 2006;13(2):125–32.

Submit your next manuscript to BioMed Central and we will help you at every step:

- We accept pre-submission inquiries
- Our selector tool helps you to find the most relevant journal
- We provide round the clock customer support
- Convenient online submission
- Thorough peer review
- Inclusion in PubMed and all major indexing services
- Maximum visibility for your research

Submit your manuscript at  
[www.biomedcentral.com/submit](http://www.biomedcentral.com/submit)

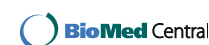

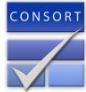

## CONSORT 2010 checklist of information to include when reporting a randomised trial\*

| Section/Topic                    | Item No | Checklist item                                                                                                                                                                              | Reported on page No |
|----------------------------------|---------|---------------------------------------------------------------------------------------------------------------------------------------------------------------------------------------------|---------------------|
| <b>Title and abstract</b>        |         |                                                                                                                                                                                             |                     |
|                                  | 1a      | Identification as a randomised trial in the title                                                                                                                                           | 1                   |
|                                  | 1b      | Structured summary of trial design, methods, results, and conclusions (for specific guidance see CONSORT for abstracts)                                                                     | 2                   |
| <b>Introduction</b>              |         |                                                                                                                                                                                             |                     |
| Background and objectives        | 2a      | Scientific background and explanation of rationale                                                                                                                                          | 4                   |
|                                  | 2b      | Specific objectives or hypotheses                                                                                                                                                           | 5                   |
| <b>Methods</b>                   |         |                                                                                                                                                                                             |                     |
| Trial design                     | 3a      | Description of trial design (such as parallel, factorial) including allocation ratio                                                                                                        | 5                   |
|                                  | 3b      | Important changes to methods after trial commencement (such as eligibility criteria), with reasons                                                                                          | No changes          |
| Participants                     | 4a      | Eligibility criteria for participants                                                                                                                                                       | 7                   |
|                                  | 4b      | Settings and locations where the data were collected                                                                                                                                        | 5                   |
| Interventions                    | 5       | The interventions for each group with sufficient details to allow replication, including how and when they were actually administered                                                       | 6-7                 |
| Outcomes                         | 6a      | Completely defined pre-specified primary and secondary outcome measures, including how and when they were assessed                                                                          | 7                   |
|                                  | 6b      | Any changes to trial outcomes after the trial commenced, with reasons                                                                                                                       | No changes          |
| Sample size                      | 7a      | How sample size was determined                                                                                                                                                              | 7                   |
|                                  | 7b      | When applicable, explanation of any interim analyses and stopping guidelines                                                                                                                | -                   |
| <b>Randomisation:</b>            |         |                                                                                                                                                                                             |                     |
| Sequence generation              | 8a      | Method used to generate the random allocation sequence                                                                                                                                      | 8                   |
|                                  | 8b      | Type of randomisation; details of any restriction (such as blocking and block size)                                                                                                         | -                   |
| Allocation concealment mechanism | 9       | Mechanism used to implement the random allocation sequence (such as sequentially numbered containers), describing any steps taken to conceal the sequence until interventions were assigned | 8                   |
| Implementation                   | 10      | Who generated the random allocation sequence, who enrolled participants, and who assigned participants to interventions                                                                     | 8                   |
| Blinding                         | 11a     | If done, who was blinded after assignment to interventions (for example, participants, care providers, those                                                                                | 8                   |

|    |                          |                                                             |                                                                                                                  |       |
|----|--------------------------|-------------------------------------------------------------|------------------------------------------------------------------------------------------------------------------|-------|
| 1  |                          | assessing outcomes) and how                                 |                                                                                                                  |       |
| 2  | 11b                      | If relevant, description of the similarity of interventions | -                                                                                                                |       |
| 3  | Statistical methods      | 12a                                                         | Statistical methods used to compare groups for primary and secondary outcomes                                    | 8     |
| 4  |                          | 12b                                                         | Methods for additional analyses, such as subgroup analyses and adjusted analyses                                 | 9     |
| 5  |                          |                                                             |                                                                                                                  |       |
| 6  | <b>Results</b>           |                                                             |                                                                                                                  |       |
| 7  | Participant flow (a      | 13a                                                         | For each group, the numbers of participants who were randomly assigned, received intended treatment, and         |       |
| 8  | diagram is strongly      |                                                             | were analysed for the primary outcome                                                                            | 9-10  |
| 9  | recommended)             | 13b                                                         | For each group, losses and exclusions after randomisation, together with reasons                                 | 9-10  |
| 10 | Recruitment              | 14a                                                         | Dates defining the periods of recruitment and follow-up                                                          | 6-7   |
| 11 |                          | 14b                                                         | Why the trial ended or was stopped                                                                               | -     |
| 12 | Baseline data            | 15                                                          | A table showing baseline demographic and clinical characteristics for each group                                 | 10    |
| 13 | Numbers analysed         | 16                                                          | For each group, number of participants (denominator) included in each analysis and whether the analysis was      |       |
| 14 |                          |                                                             | by original assigned groups                                                                                      | 11    |
| 15 | Outcomes and             | 17a                                                         | For each primary and secondary outcome, results for each group, and the estimated effect size and its            |       |
| 16 | estimation               |                                                             | precision (such as 95% confidence interval)                                                                      | 12-13 |
| 17 |                          | 17b                                                         | For binary outcomes, presentation of both absolute and relative effect sizes is recommended                      | -     |
| 18 | Ancillary analyses       | 18                                                          | Results of any other analyses performed, including subgroup analyses and adjusted analyses, distinguishing       |       |
| 19 |                          |                                                             | pre-specified from exploratory                                                                                   | 13    |
| 20 | Harms                    | 19                                                          | All important harms or unintended effects in each group (for specific guidance see CONSORT for harms)            | -     |
| 21 |                          |                                                             |                                                                                                                  |       |
| 22 | <b>Discussion</b>        |                                                             |                                                                                                                  |       |
| 23 | Limitations              | 20                                                          | Trial limitations, addressing sources of potential bias, imprecision, and, if relevant, multiplicity of analyses | 16    |
| 24 | Generalisability         | 21                                                          | Generalisability (external validity, applicability) of the trial findings                                        | 16    |
| 25 | Interpretation           | 22                                                          | Interpretation consistent with results, balancing benefits and harms, and considering other relevant evidence    | 14    |
| 26 |                          |                                                             |                                                                                                                  |       |
| 27 | <b>Other information</b> |                                                             |                                                                                                                  |       |
| 28 | Registration             | 23                                                          | Registration number and name of trial registry                                                                   | 2     |
| 29 | Protocol                 | 24                                                          | Where the full trial protocol can be accessed, if available                                                      | 5     |
| 30 | Funding                  | 25                                                          | Sources of funding and other support (such as supply of drugs), role of funders                                  | 18    |

36  
37 \*We strongly recommend reading this statement in conjunction with the CONSORT 2010 Explanation and Elaboration for important clarifications on all the items. If relevant, we also  
38 recommend reading CONSORT extensions for cluster randomised trials, non-inferiority and equivalence trials, non-pharmacological treatments, herbal interventions, and pragmatic trials.  
39 Additional extensions are forthcoming: for those and for up to date references relevant to this checklist, see [www.consort-statement.org](http://www.consort-statement.org).  
40  
41  
42

# BMJ Open

## Self-reported sick leave following a brief preventive intervention on work-related stress: a randomised controlled trial in primary health care

|                                 |                                                                                                                                                                              |
|---------------------------------|------------------------------------------------------------------------------------------------------------------------------------------------------------------------------|
| Journal:                        | <i>BMJ Open</i>                                                                                                                                                              |
| Manuscript ID                   | bmjopen-2020-041157.R1                                                                                                                                                       |
| Article Type:                   | Original research                                                                                                                                                            |
| Date Submitted by the Author:   | 17-Dec-2020                                                                                                                                                                  |
| Complete List of Authors:       | Hultén, Anna-Maria; University of Gothenburg Sahlgrenska Academy, Bjerke, Pernilla; University of Skovde<br>Holmgren, Kristina; University of Gothenburg Sahlgrenska Academy |
| <b>Primary Subject Heading</b>: | General practice / Family practice                                                                                                                                           |
| Secondary Subject Heading:      | Medical education and training, General practice / Family practice, Mental health                                                                                            |
| Keywords:                       | PRIMARY CARE, OCCUPATIONAL & INDUSTRIAL MEDICINE, PUBLIC HEALTH, MEDICAL EDUCATION & TRAINING                                                                                |
|                                 |                                                                                                                                                                              |

SCHOLARONE™  
Manuscripts





I, the Submitting Author has the right to grant and does grant on behalf of all authors of the Work (as defined in the below author licence), an exclusive licence and/or a non-exclusive licence for contributions from authors who are: i) UK Crown employees; ii) where BMJ has agreed a CC-BY licence shall apply, and/or iii) in accordance with the terms applicable for US Federal Government officers or employees acting as part of their official duties; on a worldwide, perpetual, irrevocable, royalty-free basis to BMJ Publishing Group Ltd ("BMJ") its licensees and where the relevant Journal is co-owned by BMJ to the co-owners of the Journal, to publish the Work in this journal and any other BMJ products and to exploit all rights, as set out in our [licence](#).

The Submitting Author accepts and understands that any supply made under these terms is made by BMJ to the Submitting Author unless you are acting as an employee on behalf of your employer or a postgraduate student of an affiliated institution which is paying any applicable article publishing charge ("APC") for Open Access articles. Where the Submitting Author wishes to make the Work available on an Open Access basis (and intends to pay the relevant APC), the terms of reuse of such Open Access shall be governed by a Creative Commons licence – details of these licences and which [Creative Commons](#) licence will apply to this Work are set out in our licence referred to above.

Other than as permitted in any relevant BMJ Author's Self Archiving Policies, I confirm this Work has not been accepted for publication elsewhere, is not being considered for publication elsewhere and does not duplicate material already published. I confirm all authors consent to publication of this Work and authorise the granting of this licence.

1  
2  
3 1 **Self-reported sick leave following a brief preventive intervention on work-related stress: a**  
4  
5 2 **randomised controlled trial in primary health care**  
6  
7

8 3 Anna-Maria Hultén<sup>a\*</sup>, e-mail: anna-maria.hulten@gu.se  
9

10  
11 4 Pernilla Bjerkeli<sup>a,b</sup>, e-mail: pernilla.bjerkeli@his.se  
12

13  
14 5 Kristina Holmgren<sup>a</sup>, e-mail: kristina.holmgren@neuro.gu.se  
15

16  
17 6 <sup>a</sup>Unit of Occupational Therapy, Department of Health and Rehabilitation, Institute of Neuroscience  
18  
19 7 and Physiology, Sahlgrenska Academy, University of Gothenburg, Box 455, 405 30 Gothenburg,  
20  
21 8 Sweden  
22

23  
24 9 <sup>b</sup>Department for Public Health Research, University of Skövde, Box 408, Skövde, 541 28, Sweden  
25

26  
27 10 \*Corresponding author  
28  
29

30 11  
31  
32  
33  
34  
35  
36  
37  
38  
39  
40  
41  
42  
43  
44  
45  
46  
47  
48  
49  
50  
51  
52  
53  
54  
55  
56  
57  
58  
59  
60

1  
2  
3 12 **ABSTRACT**  
4

5 13 **Objectives:** To evaluate the effectiveness of a brief intervention about early identification of work-  
6  
7 14 related stress combined with feedback at consultation with a general practitioner (GP) on the  
8  
9 15 number of self-reported sick leave days.  
10  
11

12 16 **Design:** Randomised controlled trial. Prospective analyses of self-reported sick leave data collected  
13  
14 17 between November 2015 and January 2017.  
15

16 18 **Setting:** Seven primary health care centres in western Sweden.  
17

18 19 **Participants:** The study included 271 employed, non-sick-listed patients aged 18–64 years seeking  
19  
20 20 care for mental and/or physical health complaints. Of these, 132 patients were allocated to  
21  
22 21 intervention and 139 patients to control.  
23  
24

25 22 **Interventions:** The intervention group received a brief intervention about work-related stress,  
26  
27 23 including training for GPs, screening of patients' work-related stress, feedback to patients on  
28  
29 24 screening results and discussion of measures at GP consultation. The control group received  
30  
31 25 treatment as usual.  
32  
33

34 26 **Outcome measures:** The number of self-reported gross sick leave days and the number of self-  
35  
36 27 reported net sick leave days, thereby also considering part-time sick leave.  
37  
38

39 28 **Results:** At 6 months follow-up 220/271 (81 %) participants were assessed, while at 12 months  
40  
41 29 follow-up 241/271 (89 %) participants were assessed. At 6-month follow-up 59/105 (56%) in the  
42  
43 30 intervention group and 61/115 (53%) in the control group reported no sick leave. At 12-month  
44  
45 31 follow-up the corresponding numbers were 61/119 (51%) and 57/122 (47%) respectively. There were  
46  
47 32 no statistical significant differences between the intervention group and the control group in the  
48  
49 33 median number of self-reported gross sick leave days and the median number of self-reported net  
50  
51 34 sick leave days.  
52  
53

54 35 **Conclusions:** The brief intervention showed no effect on the numbers of self-reported sick leave days  
55  
56 36 for patients seeking care at the primary health care centres. Other actions and new types of  
57  
58 37 interventions need to be explored to address patients' perceiving of ill health due to work-related  
59  
60

1  
2  
3 38 stress.  
4

5 39 **Trial registration number:** NCT02480855, ClinicalTrials.gov.  
6  
7

8 40  
9

10  
11 41 **STRENGTHS AND LIMITATIONS OF THIS STUDY**  
12

- 13  
14 42 • Few previous RCTs have focused on patients' sick leave in a primary health care context.  
15  
16 43 • Using self-reported sick leave data made it possible to include the first two weeks of sick  
17  
18 44 leave, which are not included in register data.  
19  
20  
21 45 • Due to the inherent complexity in clinical trials in primary health care practice, the statistical  
22  
23 46 power of the study might have been low.  
24  
25 47 • Sick leave data are not normally distributed and non-parametric tests therefore had to be  
26  
27 48 used for the analysis.  
28  
29  
30 49 • The outcome measure (sick leave days) is complex to interpret, as it is used both as an  
31  
32 50 indicator for ill health and as a tool for treatment of ill health.  
33  
34  
35  
36  
37  
38  
39  
40  
41  
42  
43  
44  
45  
46  
47  
48  
49  
50  
51  
52  
53  
54  
55  
56  
57  
58  
59  
60

## 51 INTRODUCTION

52 Work-related stress has been in focus for decades, as it is common and affects the individual and the  
53 society in multiple ways. Depression, anxiety and musculoskeletal disorders are all possible  
54 consequences of work-related stress.<sup>1,2</sup> Psychosocial work conditions and work-related stress also  
55 constitute risk factors for sick leave.<sup>1</sup> As a consequence, almost 50% of the 3 billion EUR paid for  
56 sickness benefits in Sweden in 2018 were due to mental disorders,<sup>3</sup> whereof reaction to severe stress  
57 and adjustment disorders constituted half,<sup>4</sup> not to mention the loss of working hours and the costs  
58 for treatment and rehabilitation.

59 Sick leave is a common outcome measure in research. However, the relationship between  
60 spells, morbidity and health is complex, since sick leave is influenced strongly by factors other than  
61 personal health.<sup>5-7</sup> Hence, controversy exists about how to conceptualise sick leave in research.<sup>6</sup> As  
62 individual, social and economic forces jointly determine absence behaviour, aspects other than work-  
63 related stress must be considered, such as attendance motivation, absence culture and sickness  
64 benefit reform.<sup>6-8</sup> Even so, sick leave can be a useful measure not only of health status and  
65 functioning<sup>9</sup> but also of future sick leave and use of disability pension.<sup>10,11</sup> In addition, using self-  
66 reported sick leave data makes it possible to consider the first two weeks of absence, which are not  
67 included in the Swedish social insurance agency's register data.

68 Research has shown that there is a strong correlation between sick leave and work-related  
69 stress<sup>12,13</sup> and that early identification of persons perceiving ill health is important for preventing sick  
70 leave.<sup>11,14</sup> In addition, screening for interacting individual and work factors could make it possible to  
71 focus on the patient's specific problems and aid in finding suitable treatments.<sup>15</sup> In Sweden, primary  
72 health care is responsible for basic medical treatment, nursing, preventive work and rehabilitation  
73 that do not require the medical and technical resources of a hospital or other specialist skills.<sup>16</sup>  
74 Primary health care is also considered best suited for preventive work.<sup>16</sup> Since general practitioners  
75 (GPs) are often the first health care contact for persons having physical or mental health complaints

1  
2  
3 76 and often handle cases concerning stress and work ability,<sup>17 18</sup> they could be a possible starting point  
4  
5 77 for preventive actions concerning ill health due to work-related stress.  
6

7 78 Commonly, GPs working at a primary health care centre in Sweden have access to several  
8  
9 79 other healthcare professionals, such as nurses, occupational therapists, physiotherapists and social  
10  
11 80 workers, sometimes organised in psychosocial teams.<sup>19</sup> However, the proportion of GPs is lower than  
12  
13 81 for most other comparable high-income countries, as are investments in other primary care  
14  
15 82 resources.<sup>20</sup> In addition, earlier studies have shown that GPs might not have the prerequisites  
16  
17 83 needed for early identification and treatment of patients perceiving ill health due to work-related  
18  
19 84 stress in order to decrease sick leave.<sup>21-23</sup> Therefore, a brief preventive intervention was designed  
20  
21 85 using the Work Stress Questionnaire (WSQ)<sup>24 25</sup> as a screening tool in combination with feedback at  
22  
23 86 patient–GP consultations.<sup>26</sup>  
24  
25  
26  
27  
28

## 29 87 **METHOD**

30  
31 88 This two-armed non-blinded randomised controlled trial (RCT) was conducted at primary health care  
32  
33 89 centres (PHCC) located in both urban and rural areas in the region Västra Götaland in Sweden. The  
34  
35 90 trial has previously been described in detail in a study protocol.<sup>26</sup> The primary outcome measures for  
36  
37 91 the RCT, i.e. the number of registered sick leave days and the number of sick leave periods during 12  
38  
39 92 months after inclusion, have previously been reported in a research article.<sup>27</sup> That study was based  
40  
41 93 on data from a national Swedish register, whereas the present study uses self-reported data on sick  
42  
43 94 leave. An important difference between the two data sources is that register data does only include  
44  
45 95 information about sick leave spells that are 15 days or longer, whereas the self-reported data  
46  
47 96 includes all sick leave. In addition, the evaluations of secondary outcome measures concerning  
48  
49 97 healthcare treatments and prescription medication have been published in two other articles.<sup>28 29</sup>  
50  
51  
52  
53  
54

## 55 98 **Objectives**

56  
57 99 The objective of the study was to evaluate the effectiveness of the brief intervention about early  
58  
59 100 identification of work-related stress combined with feedback at GP consultation on the number of  
60

1  
2  
3 101 self-reported sick leave days. The overall hypothesis was that the intervention group would have  
4  
5 102 fewer sick leave days during the year after the brief intervention compared to the control group. The  
6  
7 103 assumptions behind this were that (1) taking part in an initial training session increased the GPs'  
8  
9 104 knowledge on work-related stress, (2) filling in the WSQ raised the patients' awareness about their  
10  
11 105 level of work-related stress through self-reflection, (3) receiving feedback on WSQ results increased  
12  
13 106 the patients' motivation to address their work situation and (4) the combined effect of the training  
14  
15 107 session, filling in the WSQ and receiving feedback constituted a basis for in-depth discussions on  
16  
17 108 relevant measures at the GP-patient consultation.  
18  
19

20  
21 109 The intervention concerned sick leave due to work-related stress. Hence, it was assumed that  
22  
23 110 the effect of the intervention was higher for patients reporting high work-related stress or high  
24  
25 111 exposure to stressors according to the WSQ. This group was therefore studied explicitly.  
26  
27  
28

### 29 112 **The work stress questionnaire**

30  
31 113 The work stress questionnaire is a self-assessment questionnaire developed in a primary health care  
32  
33 114 context<sup>24</sup> and specifically designed to early identify people at risk for sick leave due to work-related  
34  
35 115 stress. It has a broad scope, since it is not directed towards patients with a specific diagnosis. The  
36  
37 116 questionnaire has a transactional perspective, as it takes the interdependence between personal and  
38  
39 117 environmental work-related characteristics into account. The 21 questions included concern both  
40  
41 118 psychosocial factors and the perceived stress thereof. The questions are classified into four  
42  
43 119 dimensions: influence at work, indistinct organisation and conflicts, individual demands and  
44  
45 120 commitment as well as work interference with leisure time.<sup>24</sup> In previous studies, the WSQ was found  
46  
47 121 to identify work-related stress and to predict sick leave.<sup>30 31</sup> In addition, the test-retest reliability and  
48  
49 122 face validity of the WSQ was found to be satisfying.<sup>24 25</sup>  
50  
51  
52  
53  
54

### 55 123 **Procedure**

56  
57 124 Seven PHCCs were included in the study, of which four were public and three were privately run.  
58  
59 125 Participating GPs had to be working at least 50% of the time at the PHCC. The recruitment of patients  
60

1  
2  
3 126 and the performance of the interventions were conducted in parallel for a period of 4–12 weeks at  
4  
5 127 each PHCC from May 2015 until January 2016. Before the intervention period, the research team  
6  
7 128 visited the centre to inform the staff about the study. During the intervention period, a research  
8  
9 129 assistant was stationed at the PHCC to identify and recruit eligible participants, give information on  
10  
11 130 the study and administer patients' informed consent. In addition, extra personnel resources were  
12  
13 131 needed to perform the training session and to administer the WSQ to the patients. Self-reported  
14  
15 132 characteristics concerning sex, age, occupational class, overall health assessed with SF-36<sup>32</sup> and  
16  
17 133 reason for consultation were collected at baseline.  
18  
19  
20  
21  
22

### 23 134 **Intervention**

24  
25 135 As an initial step, the GPs randomised to intervention received a two-hour training session including  
26  
27 136 information about work-related stress, ill health and sick leave. Instructions were also given on how  
28  
29 137 to use the WSQ and how to give feedback to the participants; in addition, GPs received information  
30  
31 138 on healthcare professionals available for referral. Before the GP–patient consultation, each patient  
32  
33 139 filled in the WSQ and questions on background characteristics. During consultation, the intervention  
34  
35 140 GPs gave feedback to the patients on the WSQ results. In addition, the GP and patient conferred  
36  
37 141 about and initiated preventive measures, if needed.  
38  
39  
40  
41

### 42 142 **Control**

43  
44 143 The GPs randomised to control were instructed to carry on as usual with their consultations and  
45  
46 144 were not informed as to whether or not the patients were participating in the study. After the  
47  
48 145 consultation, the control patients filled in the WSQ and gave information about background  
49  
50 146 characteristics.  
51  
52  
53  
54

### 55 147 **Outcomes**

56  
57 148 Follow-up data on self-reported sick leave were collected at 6 and 12 months after the intervention  
58  
59 149 by telephone or email. At 6 months' follow-up the prior 3 months were reported, while at 12  
60



1  
2  
3 150 months' follow-up the prior 6 months were reported. Data for the two follow-ups were treated  
4  
5 151 separately in the analysis. The self-reported sick leave data was operationalized into two outcome  
6  
7 152 measures: 1. Number of self-reported gross sick leave days and 2. Number of self-reported net sick  
8  
9  
10 153 leave days.

11  
12 154 In Sweden, it is possible to have part-time sick leave while working the remaining 25, 50 or  
13  
14 155 75% of full time. In addition, the extent of the part-time sick leave can vary during a spell. For  
15  
16 156 instance, it is possible to start with full time (100%) sick leave for two weeks and then to continue  
17  
18 157 with 50% sick leave while working 50%. To be able to account for the effect of part-time sick leave in  
19  
20 158 the analysis, the self-reported net days of sick leave was used as an outcome measure. Hence,  
21  
22 159 working 50% part time and being on sick leave 50% for two days equals one net sick leave day and  
23  
24 160 two gross sick leave days.

25  
26  
27 161 The number of gross sick leave days for each follow-up was calculated as the sum of the total  
28  
29 162 number of self-reported sick leave days during the study period. The number of net sick leave days  
30  
31 163 for each follow-up was calculated by multiplying the self-reported days of sick leave for each spell by  
32  
33 164 the proportion of sick leave for that spell (25, 50, 75 or 100% of fulltime). The total number of net  
34  
35 165 days during the study period were then summarized.

36  
37  
38 166 The outcome measures were based on the following request at follow-up: Define your sick  
39  
40 167 leave during the latest 3 or 6 months, each period of sick leave separately (number of days with sick  
41  
42 168 leave and proportion of full time with sick leave per period: 0%, 25%, 50%, 75%, 100% or varying  
43  
44 169 proportion. If a participant reported varying proportions of sick leave during a spell, it was treated as  
45  
46 170 50% of full time for the entire spell.

#### 51 171 **Target group, sample size and power**

52  
53  
54 172 Patients eligible to participate had to be employed, non-sick-listed, 18–64 years of age and seeking  
55  
56 173 care for depression, anxiety, musculoskeletal disorders, gastro-intestinal, cardiovascular conditions  
57  
58  
59  
60

1  
2  
3 174 or other potentially stress related symptoms. Patients with seven days sickness absence or more  
4  
5 175 during the last month were excluded as well as patients with sickness or activity benefits or ongoing  
6  
7 176 pregnancy. Patients seeking care for other causes such as psychiatric conditions (e.g. schizophrenia,  
8  
9 177 bipolar disorder), diabetes and urinary tract infection (UTI) were also excluded. The PHCCs were  
10  
11  
12 178 economically compensated for each participant recruited.

13  
14 179 An a priori power analysis was performed for the primary outcome measure of the RCT, the  
15  
16 180 number of registered sick leave days (15 days or more), with a two-sided test, a statistical  
17  
18 181 significance of  $p < 0.05$  and an 80% power. To detect at least a 15% difference between the  
19  
20 182 intervention group and the control group concerning the primary outcome, during 12 months after  
21  
22 183 inclusion at least 135 participants were needed in each group.

#### 23 24 25 26 27 184 **Randomisation and blinding**

28  
29 185 The GPs at the participating PHCCs were randomised to either the intervention group or the control  
30  
31 186 group with a 1:1 allocation. Folded slips of paper with their written names were mixed in a non-  
32  
33 187 transparent bowl and subsequently drawn, one at a time, to the two groups alternately by colleagues  
34  
35 188 not involved in the RCT. The patients consulting the GPs were therefore automatically allocated to  
36  
37 189 either group. Due to the setup of the trial, none of the parties involved were blinded after  
38  
39 190 assignment to interventions. All patients received the study information provided by the research  
40  
41 191 assistant, the intervention GPs received information and training before the study started and the  
42  
43 192 control GPs received information about the study but no training.

#### 44 45 46 47 48 49 193 **Statistical analyses**

50  
51 194 Descriptive statistics were compiled for the main baseline characteristics of the study population  
52  
53 195 included in the overall sample. In addition, separate analyses were performed for the intervention  
54  
55 196 group and the control group to detect any differences between the two. Pearson's chi-2 test was  
56  
57 197 used to test if there were any differences between the intervention group and the control group  
58  
59 198 concerning these characteristics.

1  
2  
3 199 Outcome data were missing for some patients, due to non-response at follow-up. Therefore, a  
4  
5 200 comparison was made to test whether there were differences in characteristics between patients  
6  
7 201 taking part at 6 and 12 months' follow-up, respectively, and the participants at baseline. Differences  
8  
9 202 in gender proportion, age and health status were tested using chi-square test. As no statistically  
10  
11 203 significant differences were observed, the patients taking part at the follow-up were included in the  
12  
13  
14 204 main analysis.

15  
16 205 Descriptive statistics were compiled for the length of the gross sick leave periods, to get an  
17  
18 206 overall understanding of the distribution of sick leave. For the analysis, the variable of self-reported  
19  
20 207 gross sick leave days was categorised into four levels: 0, 1–7, 8–14 and 15 days and above. These  
21  
22 208 categories were based on the Swedish sickness insurance scheme<sup>33</sup> stating that the employer pays  
23  
24 209 sick pay for up to two weeks, with one qualifying day. Thereafter, sickness benefits are handled by  
25  
26 210 the Swedish Social Insurance Agency. From day 8 of sickness onward, a doctor's certificate is  
27  
28 211 required.

29  
30  
31 212 For the main analysis, a comparison between the intervention and control groups was made  
32  
33 213 for the gross and net numbers of sick leave days at each follow-up (6 months and 12 months,  
34  
35 214 respectively). As the distribution strongly deviated from a normal distribution, medians and quartiles  
36  
37 215 were used to describe the centre and the spread of the data. The Mann-Whitney U test was used to  
38  
39 216 test the difference between median values of gross and net numbers of sick leave days in the control  
40  
41 217 group and the intervention group.

42  
43 218 Additional analyses were conducted on five subsamples with patients who reported high  
44  
45 219 exposure to stressors. In the subgroup analysis, the Mann-Whitney U test was used to test the  
46  
47 220 difference between median number of gross sick leave days in the control group and in the  
48  
49 221 intervention group. The subsamples were identified based on the results from the WSQ,<sup>24</sup> which  
50  
51 222 were defined as follows:

52  
53 223 1. *Low influence at work* included patients' seldom or never perceiving influence at work.  
54  
55  
56  
57  
58  
59  
60

- 1  
2  
3 224 2. *High stress due to indistinct organisation and conflicts* included patients perceiving their  
4  
5 225 work organisation and occurring conflicts as stressful or very stressful.  
6  
7 226 3. *High stress due to individual demands and commitment* included patients perceiving their  
8  
9 227 own work demands and commitment as stressful or very stressful.  
10  
11  
12 228 4. *High work to leisure time interference* included patients always or rather often perceiving  
13  
14 229 interference between work and leisure.  
15  
16 230 5. *Effect from one subsample or more* included participants belonging to at least one of the  
17  
18 231 above-described subsamples 1–4.

20  
21 232 All answers were given on a four-point ordinal scale. A missing value in a dimension was replaced by  
22  
23 233 the participant's median for that dimension, but only if there were answers to at least 50% of the  
24  
25 234 questions in the dimension. The median values for each dimension were then categorised into high  
26  
27 235 and low. All statistical analyses were performed in IBM SPSS Statistics 25.

### 31 236 **Patient and public involvement statement**

32  
33  
34 237 There was no patient or public involvement in the planning or conduct of this trial.  
35  
36

## 37 238 **RESULTS**

### 39 40 239 **Participant flow**

41  
42  
43 240 The 66 eligible GPs at the seven PHCCs were randomised to the intervention group or the control  
44  
45 241 group, Figure 1. Since three GPs declined to participate or did not have patients fulfilling the criteria,  
46  
47 242 there were 29 intervention GPs and 34 control GPs included. Following recruitment, 139 patients  
48  
49 243 were allocated to the intervention group and 162 patients to the control group. Of these, 7 patients  
50  
51 244 in the intervention group and 23 in the control group were excluded due to patients declining to  
52  
53 245 participate or due to logistic reasons. Altogether, 271 patients received treatment (intervention  
54  
55 246 n=132 and control n=139). Independent of group allocation, 51 of the 271 (19%) participating  
56  
57  
58 247 patients were lost to the 6-month follow-up and 30 of 271 (11%) to the 12-month follow-up. Of  
59  
60

1  
2  
3 248 these, 13 (5%) did not participate in either of the follow-ups. At 6 months' follow-up, data from 220  
4  
5 249 patients were included in the main analysis, while at 12 months' follow-up data from 241 patients  
6  
7 250 were included. A flowchart for the enrolment, allocation and follow-ups is presented in Figure 1.  
8  
9

10 251 *Insert Figure 1*

11  
12  
13 252 *Figure 1 Flowchart of enrolment, allocation and follow up.*

14  
15  
16  
17 253 **Baseline data**

18  
19 254 As shown in Table 1, two thirds of the participants (185/271) were women, 50% (134/271) were  
20  
21 255 between 31-50 years old and 40% (108/271) rated their health as good. The intervention group  
22  
23 256 (n=132) and the control group (n=139) had similar distribution of background characteristics at  
24  
25 257 baseline (n=271). However, the participants in the intervention group sought care for  
26  
27 258 musculoskeletal ill health to a higher extent.  
28  
29

30 259 Results from the WSQ showed that 108 (40%) of the 271 participants assessed their influence  
31  
32 260 at work as low, independent of group. In addition, 54 (20%) of the 271 participants reported high  
33  
34 261 stress due to indistinct organisation and conflicts, while 124 (46%) reported high stress due to high  
35  
36 262 individual demands and work commitment. The fourth WSQ-dimension, interference of work with  
37  
38 263 leisure time, was high for 109 (40%) of the patients. Finally, 188 (69%) of the patients had stressors  
39  
40 264 or stress from at least one of the four dimensions (effect from one subsample or more).  
41  
42  
43  
44 265  
45  
46  
47  
48  
49  
50  
51  
52  
53  
54  
55  
56  
57  
58  
59  
60

266 **Table 1** *Baseline characteristics of the 271 patients included in the randomised controlled trial*  
 267 *and allocated to the intervention group or the control group.*

| Variable                                |                                    | Total (n=271) |     | Intervention (n=132) |     | Control (n=139) |     | p-value <sup>1</sup> |
|-----------------------------------------|------------------------------------|---------------|-----|----------------------|-----|-----------------|-----|----------------------|
|                                         |                                    | n             | (%) | n                    | (%) | n               | (%) |                      |
| Sex                                     | Male                               | 86            | 32  | 44                   | 33  | 42              | 30  | 0.582                |
|                                         | Female                             | 185           | 68  | 88                   | 67  | 97              | 70  |                      |
| Age (years)                             | 18-30                              | 47            | 17  | 21                   | 16  | 26              | 19  | 0.060                |
|                                         | 31-50                              | 134           | 50  | 58                   | 44  | 76              | 54  |                      |
|                                         | 51-64                              | 90            | 33  | 53                   | 40  | 37              | 27  |                      |
| Occupational class                      | Skilled/unskilled manual           | 107           | 40  | 49                   | 37  | 58              | 42  | 0.675                |
|                                         | Medium/low non-manual              | 116           | 43  | 60                   | 46  | 56              | 40  |                      |
|                                         | High-level non manual              | 47            | 17  | 23                   | 17  | 24              | 17  |                      |
|                                         | Missing                            | 1             | 0   |                      |     | 1               | 1   |                      |
| Overall health, self-rated <sup>2</sup> | Excellent/very good                | 77            | 28  | 34                   | 26  | 43              | 30  | 0.526                |
|                                         | Good                               | 108           | 40  | 53                   | 40  | 55              | 40  |                      |
|                                         | Satisfactory/unsatisfactory        | 73            | 27  | 39                   | 30  | 34              | 25  |                      |
|                                         | Missing                            | 13            | 5   | 6                    | 4   | 7               | 5   |                      |
| Reason for consultation <sup>3</sup>    | Mental or behavioural              | 144           | 53  | 75                   | 57  | 69              | 50  | 0.237                |
|                                         | Musculoskeletal                    | 106           | 39  | 62                   | 47  | 44              | 32  | 0.010                |
|                                         | Gastrointestinal                   | 54            | 20  | 26                   | 20  | 28              | 20  | 0.927                |
|                                         | Cardiovascular                     | 32            | 12  | 16                   | 12  | 16              | 13  | 0.876                |
|                                         | Other                              | 56            | 21  | 29                   | 22  | 27              | 19  | 0.605                |
| WSQ results <sup>4</sup>                | Low influence at work              | 108           | 40  | 54                   | 41  | 54              | 39  | 0.729                |
|                                         | High stress organisation/conflicts | 54            | 20  | 28                   | 21  | 26              | 19  | 0.626                |
|                                         | High stress demands/work commit.   | 124           | 46  | 63                   | 48  | 61              | 44  | 0.561                |
|                                         | High work to leisure time interf.  | 109           | 40  | 54                   | 41  | 55              | 40  | 0.860                |
|                                         | Effect from one subsample or more  | 188           | 69  | 91                   | 69  | 97              | 70  | 0.809                |

<sup>1</sup>Pearson's chi-2 test to test differences between the intervention group and the control group.

<sup>2</sup>Short Form Health Survey, SF-36<sup>32</sup>

<sup>3</sup>More than one reason for consultation was possible

<sup>4</sup>Work Stress Questionnaire results from the four dimensions dichotomized into high and low levels as well as from the summary variable including effect from at least one dimension

274 **Analysis of participants responding at follow-up**

275 The basic characteristics of the participants in the intervention and the control groups responding at  
 276 follow-up are shown in Table 2. No statistically significant differences were found between baseline  
 277 and responders at 6 and 12 months' follow-up concerning sex, age or self-rated health.

278 **Table 2** *Characteristics of participants responding in the intervention group and the control*  
 279 *group at 6 and 12 months' follow-up compared to baseline.*

| Variable, 6 months (n=220) |        | Intervention |                        |                      | Control  |                        |                      |
|----------------------------|--------|--------------|------------------------|----------------------|----------|------------------------|----------------------|
|                            |        | Baseline     | Follow-up <sup>1</sup> | p-value <sup>2</sup> | Baseline | Follow-up <sup>1</sup> | p-value <sup>2</sup> |
| Numbers                    |        | 132          | 105                    |                      | 139      | 115                    |                      |
| Sex                        | Male   | 44           | 33                     | 0.756                | 42       | 35                     | 0.970                |
|                            | Female | 88           | 72                     |                      | 97       | 80                     |                      |
| Age (years)                | 18-30  | 21           | 17                     | 0.950                | 26       | 23                     | 0.908                |
|                            | 31-50  | 58           | 44                     |                      | 76       | 64                     |                      |
|                            | 51-64  | 53           | 44                     |                      | 37       | 28                     |                      |

|                                         |                             |                     |                              |                            |                 |                              |                            |
|-----------------------------------------|-----------------------------|---------------------|------------------------------|----------------------------|-----------------|------------------------------|----------------------------|
| Overall health, self-rated <sup>3</sup> | Excellent/very good         | 34                  | 26                           | 0.807                      | 43              | 36                           | 0.988                      |
|                                         | Good                        | 53                  | 39                           |                            | 55              | 45                           |                            |
|                                         | Satisfactory/unsatisfactory | 39                  | 35                           |                            | 34              | 27                           |                            |
|                                         | Missing                     | 6                   | 5                            |                            | 7               | 7                            |                            |
| <b>Variable, 12 months (n=241)</b>      |                             | <b>Intervention</b> |                              |                            | <b>Control</b>  |                              |                            |
|                                         |                             | <b>Baseline</b>     | <b>Follow-up<sup>4</sup></b> | <b>p-value<sup>2</sup></b> | <b>Baseline</b> | <b>Follow-up<sup>1</sup></b> | <b>p-value<sup>2</sup></b> |
| Numbers                                 |                             | 132                 | 119                          |                            | 139             | 122                          |                            |
| Sex                                     | Male                        | 44                  | 39                           | 0.925                      | 42              | 40                           | 0.655                      |
|                                         | Female                      | 88                  | 80                           |                            | 97              | 82                           |                            |
| Age (years)                             | 18–30                       | 21                  | 20                           | 0.951                      | 26              | 24                           | 0.869                      |
|                                         | 31–50                       | 58                  | 50                           |                            | 76              | 69                           |                            |
|                                         | 51–64                       | 53                  | 49                           |                            | 37              | 29                           |                            |
| Overall health, self-rated <sup>3</sup> | Excellent/very good         | 34                  | 32                           | 0.968                      | 43              | 38                           | 0.968                      |
|                                         | Good                        | 53                  | 46                           |                            | 55              | 49                           |                            |
|                                         | Satisfactory/unsatisfactory | 39                  | 35                           |                            | 34              | 28                           |                            |
|                                         | Missing                     | 6                   | 6                            |                            | 7               | 7                            |                            |

<sup>1</sup>6 months' follow-up

<sup>2</sup>Testing the distribution between baseline and responders at 6 months' follow-up concerning sex, age and health with Pearson's chi-2 test

<sup>3</sup>Short Form Health Survey, SF-36<sup>32</sup>

<sup>4</sup>12 months' follow-up

## 284 Descriptive statistics of sick leave

285 As shown in Figure 2, 59 (56%) of the 105 participants in the intervention group and 61 (53%) of the  
 286 115 participants in the control group reported no sick leave at all at the 6-months follow-up. At the  
 287 12-months follow-up, the corresponding numbers were 61 (51%) out of 119 and 57 (47%) out of 122,  
 288 respectively. In addition, at 6-months follow-up 30 (29%) out of 105 in the intervention group and 28  
 289 (24%) out of 115 in the control group reported 1-14 days of self-reported gross sick leave (short-term  
 290 sick-leave). At 12-month follow-up the corresponding numbers were 40 (34%) out of 119 in the  
 291 intervention group and 45 (37%) out of 122 in the control group.

292 *Insert Figure 2*

293 *Figure 2* *Number of patients having 0, 1-7, 8-14 and 15- gross days of sick leave at 6 months'*  
 294 *follow-up (n=105 in the intervention group and n=115 in the control group) and at 12*  
 295 *months' follow-up (n=119 in the intervention group and n=122 in the control group).*

## 296 Main analysis of sick leave

297 The main analysis included 220 participants at 6 months' follow-up and 241 participants at 12  
 298 months' follow-up (Figure 1). As shown in Table 3, the median numbers of both gross and net sick  
 299 leave days at 6 months follow-up were 0 days in the intervention group as well as in the control

group. At 12 months follow-up, the median numbers of both gross and net sick leave days were 0 days in the intervention group and 1 day in the control group. The differences were, however, not statistically significant, since the p-value for gross days was 0,505 and the p-value for net days was 0,490.

### Sick leave in subsamples exposed to high levels of work related stress

A comparison of the numbers of gross sick leave days for each of the five subsamples with participants who reported high levels of work related stress, is shown in Table 3. The differences in median number of sick leave days between the intervention group and the control group varied between 0 and 2 days in the different subsamples. In all subsamples, the median number of gross days with sick leave were equal or higher in the intervention group compared to the control group. There were, however, no statistically significant differences between the groups (p-values are shown in Table 3).

**Table 3** Comparison of number of sick leave days between the intervention group and the control group at 6 and 12 months' follow-up, including analysis for five subsamples.

| Follow-up                                | Sick leave measure           | Group        | Number of sick leave days |        |                 | p-value <sup>1</sup> |
|------------------------------------------|------------------------------|--------------|---------------------------|--------|-----------------|----------------------|
|                                          |                              |              | Q1 <sup>2</sup>           | Median | Q3 <sup>3</sup> |                      |
| 6 months, (n=220)                        | Gross days                   | Intervention | 0.0                       | 0.0    | 6.0             | 0.449                |
|                                          |                              | Control      | 0.0                       | 0.0    | 10.0            |                      |
|                                          | Net days                     | Intervention | 0.0                       | 0.0    | 5.9             | 0.398                |
|                                          |                              | Control      | 0.0                       | 0.0    | 9.0             |                      |
| 12 months, (n=241)                       | Gross days                   | Intervention | 0.0                       | 0.0    | 7.0             | 0.505                |
|                                          |                              | Control      | 0.0                       | 1.0    | 7.2             |                      |
|                                          | Net days                     | Intervention | 0.0                       | 0.0    | 6.2             | 0.490                |
|                                          |                              | Control      | 0.0                       | 1.0    | 6.2             |                      |
| Subsamples                               | Sick leave measure           | Group        | Number of sick leave days |        |                 | p-value <sup>1</sup> |
|                                          |                              |              | Q1 <sup>2</sup>           | Median | Q3 <sup>3</sup> |                      |
| Low influence                            | Gross days 6 months, (n= 89) | Intervention | 0.0                       | 1.0    | 10.0            | 0.810                |
|                                          |                              | Control      | 0.0                       | 0.5    | 27.0            |                      |
|                                          | Gross days 12 months (n= 94) | Intervention | 0.0                       | 2.0    | 7.0             | 0.916                |
|                                          |                              | Control      | 0.0                       | 2.0    | 6.0             |                      |
| Stress due to organisation and conflicts | Gross days 6 months (n=45)   | Intervention | 0.0                       | 0.0    | 7.5             | 0.931                |
|                                          |                              | Control      | 0.0                       | 0.0    | 17.5            |                      |
|                                          | Gross days 12 months (n=47)  | Intervention | 0.0                       | 2.5    | 7.7             | 0.877                |
|                                          |                              | Control      | 0.0                       | 2.0    | 12.0            |                      |
| Stress due to commitment                 | Gross days 6 months (n=103)  | Intervention | 0.0                       | 1.0    | 14.5            | 0.793                |
|                                          |                              | Control      | 0.0                       | 0.0    | 10.2            |                      |
|                                          | Gross days 12 months (n=106) | Intervention | 0.0                       | 2.0    | 8.0             | 0.321                |
|                                          |                              | Control      | 0.0                       | 0.0    | 5.0             |                      |



|                                   |                             |              |     |     |      |       |
|-----------------------------------|-----------------------------|--------------|-----|-----|------|-------|
| Work to leisure time interference | Gross days 6 months (n=89)  | Intervention | 0.0 | 0.0 | 6.5  | 0.446 |
|                                   |                             | Control      | 0.0 | 0.0 | 30.0 |       |
|                                   | Gross days 12 months (n=96) | Intervention | 0.0 | 2.0 | 10.0 | 0.296 |
|                                   |                             | Control      | 0.0 | 0.0 | 5.0  |       |
| Effect, any dimension             | Gross days 6 months (n=154) | Intervention | 0.0 | 0.0 | 8.0  | 0.492 |
|                                   |                             | Control      | 0.0 | 0.0 | 19.0 |       |
|                                   | Gross days 12 months (n=14) | Intervention | 0.0 | 2.0 | 8.7  | 0.310 |
|                                   |                             | Control      | 0.0 | 1.0 | 5.7  |       |

314 <sup>1</sup>Mann-Whitney U test

315 <sup>2</sup>First quartile

316 <sup>2</sup>Third quartile

## 317 DISCUSSION

### 318 Principal findings

319 This study investigated differences in self-reported sick leave between patients receiving a brief  
 320 intervention to prevent sick leave due to work-related stress and those receiving treatment as usual.  
 321 The results indicate that there was no significant difference in self-reported sick leave between the  
 322 intervention group and the control group at 6 and 12 months' follow-up. This is in line with earlier  
 323 findings from the same RCT using sick leave data from a national Swedish register including only sick  
 324 leave periods 15 days and above.<sup>27</sup> Further, there were no significant differences in the subsamples,  
 325 that is, among patients who reported high exposure to work related stressors.

### 326 Interpretation of findings

327 In this study, sick leave is used as an outcome measure, as it is considered a useful integrated  
 328 measure of physical, psychological and social functioning in studies of working populations.<sup>9</sup>  
 329 However, the relationship between ill health and sick leave is complex,<sup>7,34</sup> since it includes absence  
 330 from work that is attributed to sickness by the employee and accepted as such by the employer<sup>5</sup> and  
 331 other actors. To some extent, sick leave reflects employees' perceptions of their health and their  
 332 behaviour in response to ill health.<sup>9</sup> Ill health can therefore be treated as a prerequisite of sick leave  
 333 seen in relation to conditions within and outside of work.<sup>35</sup> Thus, previous intervention studies on  
 334 sick leave have not demonstrated any effect on sick leave.<sup>36-38</sup> Further, short-term sick leave is  
 335 considered to be more influenced by social, legal and psychological factors than health compared to  
 336 long-term sick leave.<sup>8,9</sup> An essential component of the brief intervention was the discussion of

1  
2  
3 337 relevant preventive measures during consultation. In general, GPs regard sickness certification as a  
4  
5 338 powerful and important tool.<sup>39</sup> In addition, workers use sick leave as a form of self-medication and a  
6  
7 339 preventive measure when perceiving strain at work.<sup>40</sup> Hence, the brief intervention might have  
8  
9  
10 340 contributed to GPs and patients using short-term sick leave as an early treatment and as a preventive  
11  
12 341 measure to a higher extent than otherwise. Since sick leave is used both as an indicator for ill health  
13  
14 342 and as a tool for treatment of ill health, an initial reduction in sick leave might not be a positive  
15  
16 343 outcome of the brief intervention. This complexity might be a reason why the number of sick leave  
17  
18 344 days was not lower for the intervention group than the control group.

20  
21 345         The layout of the brief intervention is fundamental for the results retrieved. The first and  
22  
23 346 perhaps foremost aspect of the intervention was to increase the GPs' knowledge and awareness  
24  
25 347 about work-related stress, but the training session received might not have been exhaustive enough  
26  
27 348 to raise GPs' attention to patients with work-related problems or lead them to address such a  
28  
29 349 complex health issue.<sup>41 42</sup> Secondly, filling in the WSQ was expected to increase the patients'  
30  
31 350 awareness about their symptoms being stress-related. The use of patient-reported outcome  
32  
33 351 measures has indeed been shown to improve the understanding of symptoms and facilitate  
34  
35 352 communication.<sup>43 44</sup> However, early in the clinical reasoning process patients could be in need of  
36  
37 353 rapport building and exclusion of physical diseases and consequently resist a psychiatric  
38  
39 354 explanation.<sup>45</sup> Thirdly, receiving feedback on WSQ results was hypothesised to increase patients'  
40  
41 355 motivation to address their work situation. However, the link between antecedents of motivation  
42  
43 356 and enactment is complex. It is therefore necessary to take, for instance, past behaviour, intention,  
44  
45 357 perceived behavioural control and outcome expectancy into account<sup>46</sup> to be able to understand this  
46  
47 358 link. Thus, receiving feedback might not be sufficient to increase motivation to act. Fourthly, the first  
48  
49 359 three components combined in the brief intervention were assumed to constitute a basis for fruitful  
50  
51 360 GP–patient discussions and initiating relevant measures. In concordance, collaborations with patients  
52  
53 361 and colleagues are seen as important elements in the referral process.<sup>47</sup> However, according to GPs,  
54  
55 362 other aspects such as reluctance to cooperate with patients and sparse contact with colleagues could  
56  
57  
58  
59  
60

1  
2  
3 363 affect the referral process<sup>47</sup> and the measures taken. Taken together, factors related to the study  
4  
5 364 setup might have diluted the effect of the intervention, so that no difference in self-reported sick  
6  
7 365 leave days was detected, even for the subsamples highly exposed to stressors.

9  
10 366 The last step of the brief intervention, that is, discussing measures, was left for the GPs to  
11  
12 367 organise as they deemed fit, rather than being specified in the study protocol. In general, GPs have a  
13  
14 368 common understanding of their practice arising not only from the field of general practice but also  
15  
16 369 from the mission of the Swedish primary health care system.<sup>19</sup> The overall way of working would  
17  
18 370 therefore be similar. However, the results from a process evaluation of this RCT<sup>48</sup> indicate that the  
19  
20 371 prerequisites for discussing measures might not have been ideal. The brief intervention was not  
21  
22 372 found to assist the GPs in their work, since it could alter their already well-functioning work  
23  
24 373 procedure. This confirms previous findings, where the use of instruments to obtain a quantitative  
25  
26 374 score of depression was not perceived as useful by GPs.<sup>49</sup> The process evaluation also showed that  
27  
28 375 the GPs could find it difficult to interpret and act on the results from the WSQ and could even  
29  
30 376 question their responsibility for prevention of patients' ill health due to work-related stress, when  
31  
32 377 resources were sparse. The intervention might therefore not have been efficient enough to add any  
33  
34 378 effect on the days of sick leave at the follow-ups. Further, these aspects might have diminished the  
35  
36 379 differences in measures taken between the intervention group and the control groups.

### 380 **Strengths and limitations**

381 Few RCTs in primary health care have focused on patients' sick leave.<sup>36-38</sup> In some respects, this study  
382 can be considered as pragmatic, since it is designed to test the impact of the brief intervention on  
383 sick leave in clinical practice. Inherent in pragmatic trials is a significant heterogeneity concerning  
384 patients, treatments and clinical settings, which leads to dilution of the effect of the intervention.<sup>50</sup>  
385 Consequently, pragmatic trials must be large. The initial power calculation stipulated a need for 135  
386 individuals per group in order to detect a 15% difference between the groups. In the current study,  
387 groups with 105 and 115 participants per group at 6 months follow-up and 119 and 122 participants  
388 per group at 12 months follow up were compared. The statistical power of the study is thus

1  
2  
3 389 uncertain. It is therefore not possible to exclude the risk that there were differences between the  
4  
5 390 groups that could not be detected due to lack of statistical power. However, looking more closely at  
6  
7 391 the data, there are no trends that would suggest undetected differences in the main analysis. The  
8  
9 392 number of days with sick leave are almost equal in the two groups regardless of outcome measure at  
10  
11 393 6 months follow-up. At 12 months follow-up, the median number of days is slightly higher in the  
12  
13 394 control group than the intervention group but the difference is small (0 versus 1) and not strongly  
14  
15 395 reflected in the quartiles for any of the outcome variables. The subgroup analysis of individual who  
16  
17 396 reported high exposure to work related stress was performed as an attempt to focus the analysis  
18  
19 397 towards a group of participants where the effect of the intervention was expected to be more  
20  
21 398 pronounced, thus requiring smaller groups in order to be statistically detected. There were, however,  
22  
23 399 no statically significant differences in the subgroup analysis either. It should be noted that the non-  
24  
25 400 significant differences in the subgroup analysis, all point in the same direction. In all sub-samples the  
26  
27 401 median number of days with sick leave is equal or higher in the intervention group than in the  
28  
29 402 control group. This non-significant trend is opposite to what was detected in the main analysis where  
30  
31 403 there was a slightly higher median number of days in the control group at 12 months follow-up. The  
32  
33 404 fact that none of the differences were statically significant and that the numbers point in different  
34  
35 405 directions could be regarded as support for the finding that the intervention was not effective.  
36  
37 406 However, the fact that all differences in the subgroup analysis pointed in the same direction could  
38  
39 407 also suggest that the intervention did have effect among those who reported high exposure to work  
40  
41 408 related stress but that the statistical power was too low to detect this difference. Another study  
42  
43 409 design, including a larger group of individuals with known high exposure to stress would be needed  
44  
45 410 to investigate this further.  
46  
47 411 The trial also included aspects of explanatory trials, that is, trials that aim to evaluate the efficacy of  
48  
49 412 an intervention in a well-defined and controlled setting,<sup>50</sup> as extra personnel administered parts of  
50  
51 413 the intervention. Otherwise, the study would not have been feasible. As a result, the generalisability  
52  
53 414 and application in routine practice settings decreased.  
54  
55  
56  
57  
58  
59  
60

1  
2  
3 415 The choice of outcome measures has to be taken into consideration. There are different  
4  
5 416 methodological aspects and approaches to consider in using sick leave data in research.<sup>51</sup> Spell  
6  
7 417 measures, person measures and time-based measures have to be used wisely<sup>51</sup> to capture any  
8  
9 418 differences between the intervention group and the control group. Therefore, both the self-reported  
10  
11 419 gross sick leave days and net sick leave days were used as outcome measures in this study. However,  
12  
13 420 other outcome measures describing sick leave, such as not only number of days from intervention to  
14  
15 421 sick leave but also health-related measures, might have been needed to capture an effect of the  
16  
17 422 intervention.  
18  
19

20  
21 423 The use of self-reported sick leave data was considered as a reasonable choice, as it made it  
22  
23 424 possible to account for the first two weeks of sick leave. Thereby, any short periods of sick leave  
24  
25 425 initiated by the workers themselves or by the GPs were included. Even so, self-reported data can be  
26  
27 426 afflicted with recall bias. However, earlier studies indicate that there is good agreement between  
28  
29 427 self-reported data and register information.<sup>52 53</sup> Even though the response rate was high, data were  
30  
31 428 missing. Non-responders had to be accounted for, as this could affect the validity of trial findings.<sup>54</sup>  
32  
33 429 Multiple imputation of missing data was not possible, since the data were not normally distributed.  
34  
35 430 In addition, simple imputation, such as last value carried forward, was found to be inappropriate, as  
36  
37 431 it assumes a strong correlation between a prior and a later value. Since there were no statistically  
38  
39 432 significant differences in characteristics between responders at baseline and at follow-up, using not  
40  
41 433 imputed data for responders at 6 and 12 months' follow-up for the main analysis was considered the  
42  
43 434 best option. In addition, analysing sick leave data can be challenging, as it is not normal distributed.<sup>50</sup>  
44  
45 435 Non-parametric tests, generally with less power, were therefore used in this study. The relatively  
46  
47 436 small sample size and the statistical methods used both contributed to lowering the power. Thus, it is  
48  
49 437 not possible to know whether the intervention had no effect or if it was not possible to detect an  
50  
51 438 effect.  
52  
53  
54  
55  
56  
57

## 58 439 **Conclusions and implications**

59  
60

1  
2  
3 440 Based on the results from this RCT, the brief intervention showed no effect on the number of self-  
4  
5 441 reported sick leave days. The study yielded information about the provision of interventions in  
6  
7 442 primary health care. When performing RCTs in primary health care settings, the design is determined  
8  
9 443 by what is regarded as viable. Contextual aspects such as adapted educational efforts on different  
10  
11 444 levels, the patients' needs and GPs' attitudes to the intervention have to be considered thoroughly  
12  
13 445 when developing and implementing interventions on preventing sick leave due to work-related  
14  
15 446 stress. In addition, the results can lead to discussions about how to use sick leave as an outcome  
16  
17 447 measure. Even so, there is a significant need for further research into these issues, given the  
18  
19 448 individual and societal consequences of ill health due to work-related stress and the limited  
20  
21 449 resources to provide treatment in a cost-effective way.  
22  
23  
24  
25  
26

## 27 450 **DECLARATIONS**

28  
29  
30 451 **Acknowledgements** The authors would like to acknowledge the PHCCs and especially the GPs and  
31  
32 452 patients taking part in this study as well as the co-workers in the research group TIDAS for their  
33  
34 453 support and feedback.  
35  
36  
37

38 454 **Contributors** KH is the principal investigator and in charge of the RCT. KH was involved in designing  
39  
40 455 the RCT and applying for funding. Statistical analysis was performed by AMH in close collaboration  
41  
42 456 with PB. AMH drafted the manuscript, which was edited by KH and PB. All three authors critically  
43  
44 457 reviewed and approved the final version of the manuscript.  
45  
46  
47

48 458 **Funding** This study was funded by the Swedish Research Council for Health, Working Life and  
49  
50 459 Welfare (2014-0936).  
51  
52  
53

54 460 **Disclaimer** The Swedish Research Council for Health, Working Life and Welfare had no role in the  
55  
56 461 design of the study, data collection, analysis or interpretation of data, or in writing the manuscript.  
57  
58  
59  
60

1  
2  
3 462 **Competing interests** The authors declare that they have no competing interests.  
4  
5

6  
7 463 **Patient consent for publication** Not required.  
8  
9

10 464 **Ethical approval** The project received ethical approval, reference number 125–15, from the Regional  
11  
12 465 Ethical Review Board in Gothenburg, Sweden.  
13  
14

15  
16 466 **Data availability statement** For ethical reasons the datasets generated and analysed during the  
17  
18 467 current study are not publicly available, but they are available from the corresponding author on  
19  
20 468 reasonable request.  
21  
22

23  
24 469 **Word count** 4152 (Introduction, Method, Results, Discussion and Conclusions and implications)  
25

26  
27 470 **License statement** Other than as permitted in any relevant BMJ Author's Self Archiving Policies, I  
28  
29 471 confirm this Work has not been accepted for publication elsewhere, is not being considered for  
30  
31 472 publication elsewhere and does not duplicate material already published. I confirm all authors  
32  
33 473 consent to publication of this Work and authorise the granting of this licence  
34  
35

## 36 37 474 **REFERENCES** 38

- 39  
40 475 1. Mather L, Bergström G, Blom V, et al. High job demands, job strain, and iso-strain are risk factors  
41  
42 476 for sick leave due to mental disorders a prospective Swedish twin study with a 5-year follow-  
43  
44 477 up. *J Occup Environ Med* 2015;57(8):858-65.  
45  
46 478 2. Da Costa BR, Vieira ER. Risk factors for work-related musculoskeletal disorders: A systematic  
47  
48 479 review of recent longitudinal studies. *Am J Ind Med* 2010;53(3):285-323.  
49  
50 480 3. Socialförsäkringen i siffror 2019 [Social Insurance in Figures 2019]. Stockholm: The Swedish Social  
51  
52 481 Insurance Agency, 2019.  
53  
54 482 4. Sjukskrivning för reaktioner på svår stress ökar mest [Sick leave for reactions to severe stress  
55  
56 483 increases most]. Stockholm: The Swedish Social Insurance Agency, 2016.  
57  
58 484 5. Whitaker SC. The management of sick leave. *Occup Environ Med* 2001;58(6):420-24.  
59  
60

- 1  
2  
3 485 6. Allebeck P, Mastekaasa A. Chapter 3. Causes of sick leave: Research approaches and explanatory  
4  
5 486 models. *Scand J Public Health Suppl* 2004;32(63):36-43.  
6  
7 487 7. Kangas M, Muotka J, Huhtala M, et al. Is the Ethical Culture of the Organization Associated with  
8  
9 488 Sick leave? A Multilevel Analysis in a Public Sector Organization. *J Bus Ethics* 2017;140(1):131-  
10  
11 489 45.  
12  
13 490 8. Aaviksoo E, Kiivet RA. Influence of the sickness benefit reform on sick leave. *Health policy*  
14  
15 491 2016;120(9):1070-78.  
16  
17 492 9. Marmot M, Feeney A, Shipley M, et al. Sick leave as a measure of health status and functioning:  
18  
19 493 From the UK Whitehall II study. *J Epidemiol Community Health* 1995;49(2):124-30.  
20  
21 494 10. Kivimäki M, Forma P, Wikström J, et al. Sick leave as a risk marker of future disability pension: The  
22  
23 495 10-town study. *J Epidemiol Community Health* 2004;58(8):710-11.  
24  
25 496 11. Hultin H, Lindholm C, Malfert M, et al. Short-term sick leave and future risk of sick leave and  
26  
27 497 unemployment - The impact of health status. *BMC Public Health* 2012;12(1).  
28  
29 498 12. Bakker AB, Demerouti E, de Boer E, et al. Job demand and job resources as predictors of absence  
30  
31 499 duration and frequency. *J Vocat Behav* 2003;62(2):341-56.  
32  
33 500 13. Holmgren K, Hensing G, Dellve L. The association between poor organizational climate and high  
34  
35 501 work commitments, and sick leave in a general population of women and men. *J Occup*  
36  
37 502 *Environ Med* 2010;52(12):1179-85.  
38  
39 503 14. Kant I, Jansen NWH, Van Amelsvoort LGPM, et al. Structured early consultation with the  
40  
41 504 occupational physician reduces sick leave among office workers at high risk for long-term sick  
42  
43 505 leave: A randomized controlled trial. *J Occup Rehabil* 2008;18(1):79-86.  
44  
45 506 15. Boersma K, Linton SJ. Screening to identify patients at risk: Profiles of psychological risk factors  
46  
47 507 for early intervention. *Clin J Pain* 2005;21(1):38-43.  
48  
49 508 16. God och nära vård – En primärvårdsreform [Good quality, local health care – A primary care  
50  
51 509 reform]. Swedish Government Official Reports, SOU 2018:39. Stockholm: Government  
52  
53  
54  
55  
56  
57  
58  
59  
60



- 1  
2  
3 510 Offices of Sweden, Ministry of Health and Social Affairs, 2018.  
4  
5 511 <https://data.riksdagen.se/fil/FD4442D3-C4D5-4799-869C-A00930A003F5>  
6  
7 512 17. Lykkegaard J, Rosendal M, Brask K, et al. Prevalence of persons contacting general practice for  
8  
9  
10 513 psychological stress in Denmark. *Scand J Prim Health Care* 2018;36(3):272-80.  
11  
12 514 18. Lofgren A, Hagberg J, Arrelöv B, et al. Frequency and nature of problems associated with sickness  
13  
14 515 certification tasks: a cross-sectional questionnaire study of 5455 physicians. *Scand J Prim*  
15  
16 516 *Health Care* 2007;25(3):178-85.  
17  
18 517 19. Primärvårdens uppdrag : en kartläggning av hur landstingens uppdrag till primärvården är  
19  
20  
21 518 formulerade. Stockholm: The National Board of Health and Welfare, 2016.  
22  
23 519 20. Anell A. The public-private pendulum-patient choice and equity in Sweden. *New Engl J Med*  
24  
25 520 2015;372(1):1-4.  
26  
27 521 21. Stureson M, Edlund C, Fjellman-Wiklund A, et al. Work ability as obscure, complex and unique:  
28  
29  
30 522 Views of Swedish occupational therapists and physicians. *Work* 2013;45(1):117-28.  
31  
32 523 22. Nilsing E, Söderberg E, Berterö C, et al. Primary healthcare professionals' experiences of the sick  
33  
34 524 leave process: A focus group study in Sweden. *J Occup Rehabil* 2013;23(3):450-61.  
35  
36 525 23. Carlsson L, Lännerström L, Wallman T, et al. General practitioners' perceptions of working with  
37  
38  
39 526 the certification of sick leaves following changes in the Swedish social security system: A  
40  
41 527 qualitative focus-group study. *BMC Fam Pract* 2015;16(1)  
42  
43 528 24. Holmgren K, Hensing G, Dahlin-Ivanoff S. Development of a questionnaire assessing work-related  
44  
45 529 stress in women - Identifying individuals who risk being put on sick leave. *Disabil Rehabil*  
46  
47 530 2009;31(4):284-92.  
48  
49 531 25. Frantz A, Holmgren K. The Work Stress Questionnaire (WSQ) - Reliability and face validity among  
50  
51 532 male workers. *BMC Public Health* 2019;19(1).  
52  
53 533 26. Holmgren K, Sandheimer C, Mardby AC, et al. Early identification in primary health care of people  
54  
55 534 at risk for sick leave due to work-related stress - study protocol of a randomized controlled  
56  
57 535 trial (RCT). *BMC Public Health* 2016;16(1):1193.  
58  
59  
60

- 1  
2  
3 536 27. Holmgren K, Hensing G, Bültmann U, et al. Does early identification of work-related stress,  
4  
5 537 combined with feedback at GP-consultation, prevent sick leave in the following 12 months? a  
6  
7 538 randomized controlled trial in primary health care. *BMC Public Health* 2019;19(1):1110.  
8  
9  
10 539 28. Sandheimer C, Hedenrud T, Hensing G, et al. Effects of a work stress intervention on healthcare  
11  
12 540 use and treatment compared to treatment as usual: a randomised controlled trial in Swedish  
13  
14 541 primary healthcare. *BMC Fam Pract.* 2020 Jul 6;21(1):133.  
15  
16 542 29. Bjerkeli PJ, Skoglund I, Holmgren K. Does early identification of high work related stress affect  
17  
18 543 pharmacological treatment of primary care patients? - analysis of Swedish pharmacy  
19  
20 544 dispensing data in a randomised control study. *BMC Fam Pract.* 2020 Apr 25;21(1):70.  
21  
22  
23 545 30. Holmgren K, Fjällström-Lundgren M, Hensing G. Early identification of work-related stress  
24  
25 546 predicted sickness absence in employed women with musculoskeletal or mental disorders: a  
26  
27 547 prospective, longitudinal study in a primary health care setting. *Disabil Rehabil.*  
28  
29 548 2013;35(5):418-426.  
30  
31  
32 549 31. Holmgren K, Dahlin-Ivanoff S, Björkelund C, et al. The prevalence of work-related stress, and its  
33  
34 550 association with self-perceived health and sick-leave, in a population of employed Swedish  
35  
36 551 women. *BMC Public Health.* 2009;9.  
37  
38  
39 552 32. Sullivan M, Karlsson J, Ware JE, Jr. [The Swedish SF-36 health survey, part 1] Evaluation of data  
40  
41 553 quality, scaling assumptions, reliability and construct validity across general populations in  
42  
43 554 Sweden. *Soc Sci Med.* 1995;41(10):1349.  
44  
45  
46 555 33. Social insurance in Sweden. Stockholm: Government Offices of Sweden, Ministry of Health and  
47  
48 556 Social Affairs, 2016.  
49  
50 557 [https://www.government.se/495457/globalassets/government/dokument/socialdeparteme](https://www.government.se/495457/globalassets/government/dokument/socialdepartementet/socialinsuranceinsweden_august-2016.pdf)  
51  
52 558 [ntet/socialinsuranceinsweden\\_august-2016.pdf](https://www.government.se/495457/globalassets/government/dokument/socialdepartementet/socialinsuranceinsweden_august-2016.pdf)  
53  
54  
55 559 34. Kaiser CP. What do we know about employee absence behavior? An interdisciplinary  
56  
57 560 interpretation. *J Socio-Econ* 1998;27(1):79-96.  
58  
59  
60

- 1  
2  
3 561 35. Johansson G, Lundberg I. Adjustment latitude and attendance requirements as determinants of  
4  
5 562 sick leave or attendance. Empirical tests of the illness flexibility model. *Soc Sci Med*  
6  
7 563 2004;58(10):1857-68.  
8  
9  
10 564 36. Kaldo V, Lundin A, Hallgren M, et al. Effects of internet-based cognitive behavioural therapy and  
11  
12 565 physical exercise on sick leave and employment in primary care patients with depression:  
13  
14 566 Two subgroup analyses. *Occup Environ Med* 2018;75(1):52-58.  
15  
16 567 37. Wikberg C, Westman J, Petersson EL, et al. Use of a self-rating scale to monitor depression  
17  
18 568 severity in recurrent GP consultations in primary care - does it really make a difference? A  
19  
20 569 randomised controlled study.(Report). *BMC Fam Pract* 2017;18(1).  
21  
22  
23 570 38. Rantonen J, Karppinen J, Vehtari A, et al. Effectiveness of three interventions for secondary  
24  
25 571 prevention of low back pain in the occupational health setting - A randomised controlled trial  
26  
27 572 with a natural course control. *BMC Public Health* 2018;18(1)  
28  
29  
30 573 39. MacDonald S, Maxwell M, Wilson P, et al. A powerful intervention: General practitioners'; Use of  
31  
32 574 sickness certification in depression. *BMC Fam Pract* 2012;13(1):82.  
33  
34 575 40. Danielsson L, Elf M, Hensing G. Strategies to keep working among workers with common mental  
35  
36 576 disorders—a grounded theory study. *Disabil Rehabil* 2019;41(7):786-95.  
37  
38  
39 577 41. Rankin L, Fowler CJ, Stålnacke BM, et al. What influences chronic pain management? A best–  
40  
41 578 worst scaling experiment with final year medical students and general practitioners. *Br J Pain*  
42  
43 579 2019;13(4):214-25.  
44  
45 580 42. de Kock CA, Lucassen PLBJ, Bor H, et al. Training GPs to improve their management of work-  
46  
47 581 related problems: Results of a cluster randomized controlled trial. *Eur J Gen Pract*  
48  
49 582 2018;24(1):258-65.  
50  
51 583 43. Wikberg C, Pettersson A, Westman J, et al. Patients' perspectives on the use of the Montgomery-  
52  
53 584 Asberg depression rating scale self-assessment version in primary care. *Scand J Prim Health*  
54  
55 585 *Care* 2016;34(4):434-42.  
56  
57  
58  
59  
60

- 1  
2  
3 586 44. Talib TL, DeChant P, Kean J, et al. A qualitative study of patients' perceptions of the utility of  
4  
5 587 patient-reported outcome measures of symptoms in primary care clinics. *Quality of Life*  
6  
7 588 *Research* 2018;27(12):3157-66.
- 9  
10 589 45. Lampe L, Shadbolt N, Starcevic V, et al. Diagnostic processes in mental health: GPs and  
11  
12 590 psychiatrists reading from the same book but on a different page. *Australas Psychiatry*  
13  
14 591 2012;20(5):374-78.
- 16 592 46. Hagger MS, Chatzisarantis NLD. Integrating the theory of planned behaviour and self-  
17  
18 593 determination theory in health behaviour: A meta-analysis. *Br J Health Psychol*  
19  
20 594 2009;14(2):275-302.
- 23 595 47. Thorsen O, Hartveit M, Johannessen JO, et al. Typologies in GPs' referral practice. *BMC Fam Pract*  
24  
25 596 2016;17(1).
- 27 597 48. Hultén AM, Dahlin-Ivanoff S, Holmgren K. Positioning work related stress - GPs' reasoning about  
28  
29 598 using the WSQ combined with feedback at consultation. *BMC Fam Pract*. 2020;21(1).
- 31  
32 599 49. Pettersson A, Björkelund C, Petersson E. To score or not to score: A qualitative study on GPs  
33  
34 600 views on the use of instruments for depression. *Fam Pract* 2014;31(2):215-21.
- 36 601 50. Patsopoulos NA. A pragmatic view on pragmatic trials. *Dialogues Clin Neurosci* 2011;13(2):217.
- 38  
39 602 51. Hensing G, Alexanderson K, Bjurulf P, et al. How to measure sick leave? Literature review and  
40  
41 603 suggestion of five basic measures. *Scand J Public Health* 1998;26(2):133-44.
- 43 604 52. Voss M, Stark S, Alfredsson L, et al. Comparisons of self-reported and register data on sick leave  
44  
45 605 among public employees in Sweden. *Occup Environ Med* 2008;65(1):61-67.
- 47  
48 606 53. Thorsen SV, Flyvholm MA, Bültmann U. Self-reported or register-based? A comparison of sick  
49  
50 607 leave data among 8110 public and private employees in Denmark. *Scand J Work Environ*  
51  
52 608 *Health* 2018;44(6):631-38.
- 54  
55 609 54. Liao JM, Stack CB. Annals understanding clinical research: Implications of missing data due to  
56  
57 610 dropout. *Ann Intern Med* 2017;166(8):596-98.
- 58  
59  
60

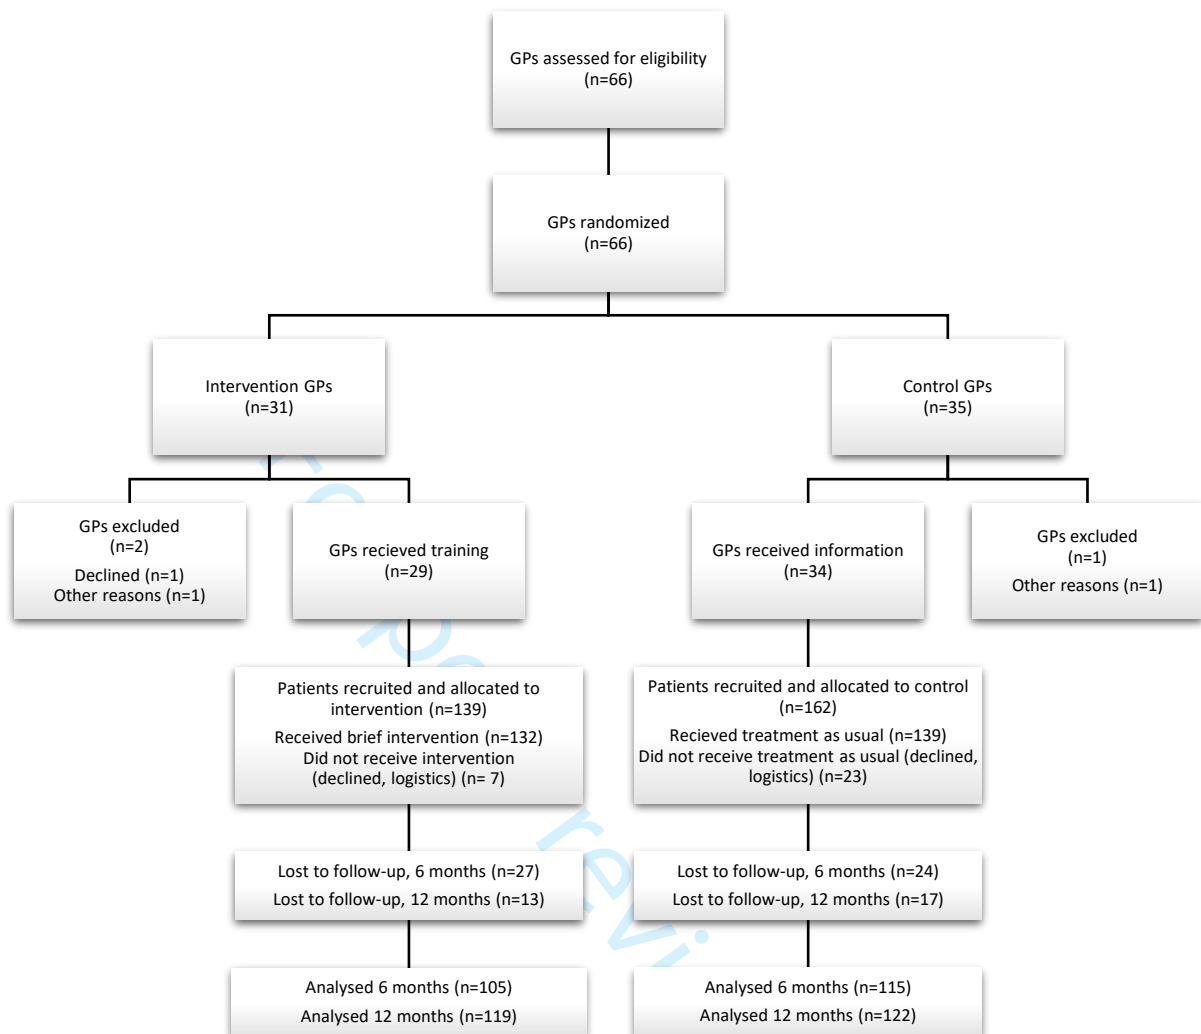

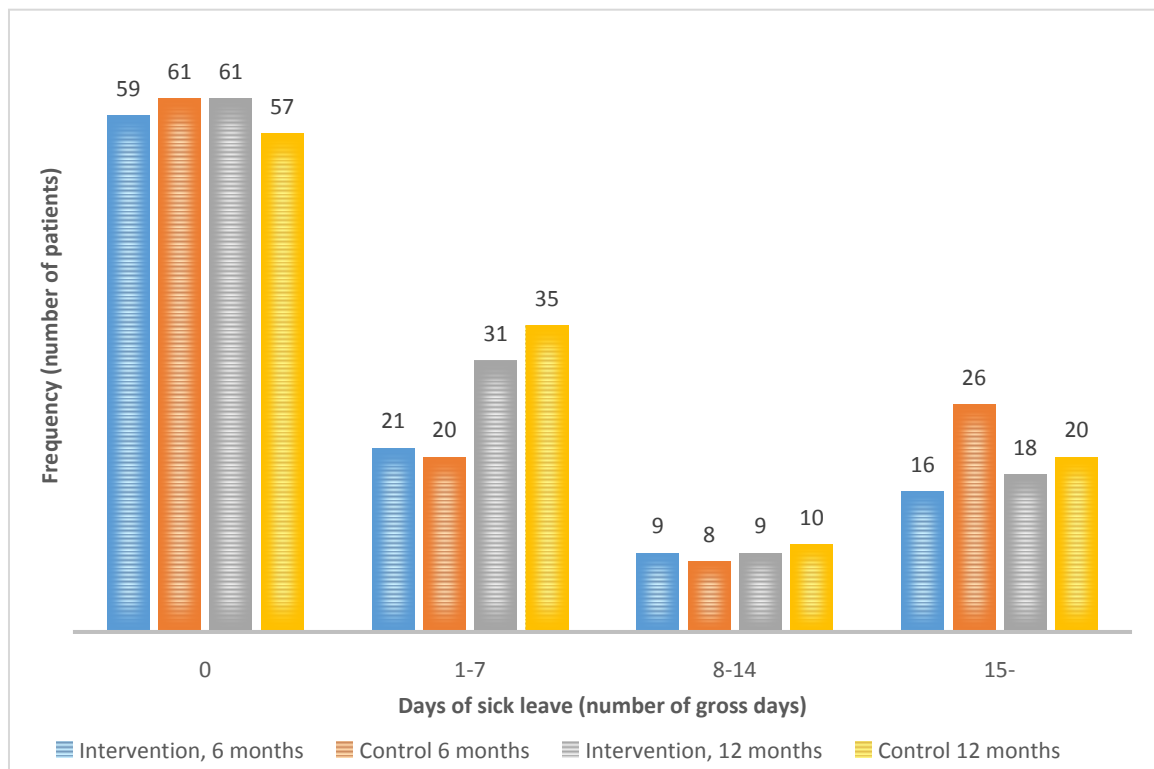

**Figure 2** Number of patients having 0, 1-7, 8-14 and 15- gross days of sick leave at 6 months' follow-up ( $n=105$  in the intervention group and  $n=115$  in the control group) and at 12 months' follow-up ( $n=119$  in the intervention group and  $n=122$  in the control group).

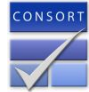

## CONSORT 2010 checklist of information to include when reporting a randomised trial\*

| Section/Topic                    | Item No | Checklist item                                                                                                                                                                              | Reported on page No |
|----------------------------------|---------|---------------------------------------------------------------------------------------------------------------------------------------------------------------------------------------------|---------------------|
| <b>Title and abstract</b>        |         |                                                                                                                                                                                             |                     |
|                                  | 1a      | Identification as a randomised trial in the title                                                                                                                                           | 1                   |
|                                  | 1b      | Structured summary of trial design, methods, results, and conclusions (for specific guidance see CONSORT for abstracts)                                                                     | 2                   |
| <b>Introduction</b>              |         |                                                                                                                                                                                             |                     |
| Background and objectives        | 2a      | Scientific background and explanation of rationale                                                                                                                                          | 4                   |
|                                  | 2b      | Specific objectives or hypotheses                                                                                                                                                           | 5-6                 |
| <b>Methods</b>                   |         |                                                                                                                                                                                             |                     |
| Trial design                     | 3a      | Description of trial design (such as parallel, factorial) including allocation ratio                                                                                                        | 5                   |
|                                  | 3b      | Important changes to methods after trial commencement (such as eligibility criteria), with reasons                                                                                          | No changes          |
| Participants                     | 4a      | Eligibility criteria for participants                                                                                                                                                       | 8-9                 |
|                                  | 4b      | Settings and locations where the data were collected                                                                                                                                        | 5                   |
| Interventions                    | 5       | The interventions for each group with sufficient details to allow replication, including how and when they were actually administered                                                       | 7                   |
| Outcomes                         | 6a      | Completely defined pre-specified primary and secondary outcome measures, including how and when they were assessed                                                                          | 7-8                 |
|                                  | 6b      | Any changes to trial outcomes after the trial commenced, with reasons                                                                                                                       | No changes          |
| Sample size                      | 7a      | How sample size was determined                                                                                                                                                              | 9                   |
|                                  | 7b      | When applicable, explanation of any interim analyses and stopping guidelines                                                                                                                | -                   |
| <b>Randomisation:</b>            |         |                                                                                                                                                                                             |                     |
| Sequence generation              | 8a      | Method used to generate the random allocation sequence                                                                                                                                      | 9                   |
|                                  | 8b      | Type of randomisation; details of any restriction (such as blocking and block size)                                                                                                         | -                   |
| Allocation concealment mechanism | 9       | Mechanism used to implement the random allocation sequence (such as sequentially numbered containers), describing any steps taken to conceal the sequence until interventions were assigned | 9                   |
| Implementation                   | 10      | Who generated the random allocation sequence, who enrolled participants, and who assigned participants to interventions                                                                     | 9                   |
| Blinding                         | 11a     | If done, who was blinded after assignment to interventions (for example, participants, care providers, those                                                                                | 9                   |

|                                                      |     |                                                                                                                                                   |                 |
|------------------------------------------------------|-----|---------------------------------------------------------------------------------------------------------------------------------------------------|-----------------|
|                                                      |     | assessing outcomes) and how                                                                                                                       |                 |
|                                                      | 11b | If relevant, description of the similarity of interventions                                                                                       | -               |
| Statistical methods                                  | 12a | Statistical methods used to compare groups for primary and secondary outcomes                                                                     | 9-10            |
|                                                      | 12b | Methods for additional analyses, such as subgroup analyses and adjusted analyses                                                                  | 10              |
| <b>Results</b>                                       |     |                                                                                                                                                   |                 |
| Participant flow (a diagram is strongly recommended) | 13a | For each group, the numbers of participants who were randomly assigned, received intended treatment, and were analysed for the primary outcome    | 11-12           |
|                                                      | 13b | For each group, losses and exclusions after randomisation, together with reasons                                                                  | 11-12           |
| Recruitment                                          | 14a | Dates defining the periods of recruitment and follow-up                                                                                           | 6-7             |
|                                                      | 14b | Why the trial ended or was stopped                                                                                                                | -               |
| Baseline data                                        | 15  | A table showing baseline demographic and clinical characteristics for each group                                                                  | 13, Table 1     |
| Numbers analysed                                     | 16  | For each group, number of participants (denominator) included in each analysis and whether the analysis was by original assigned groups           | 11-12, Figure 1 |
| Outcomes and estimation                              | 17a | For each primary and secondary outcome, results for each group, and the estimated effect size and its precision (such as 95% confidence interval) | 14-15           |
|                                                      | 17b | For binary outcomes, presentation of both absolute and relative effect sizes is recommended                                                       | -               |
| Ancillary analyses                                   | 18  | Results of any other analyses performed, including subgroup analyses and adjusted analyses, distinguishing pre-specified from exploratory         | 13-14           |
| Harms                                                | 19  | All important harms or unintended effects in each group (for specific guidance see CONSORT for harms)                                             | -               |
| <b>Discussion</b>                                    |     |                                                                                                                                                   |                 |
| Limitations                                          | 20  | Trial limitations, addressing sources of potential bias, imprecision, and, if relevant, multiplicity of analyses                                  | 18-20           |
| Generalisability                                     | 21  | Generalisability (external validity, applicability) of the trial findings                                                                         | 18-20           |
| Interpretation                                       | 22  | Interpretation consistent with results, balancing benefits and harms, and considering other relevant evidence                                     | 16-18           |
| <b>Other information</b>                             |     |                                                                                                                                                   |                 |
| Registration                                         | 23  | Registration number and name of trial registry                                                                                                    | 3               |
| Protocol                                             | 24  | Where the full trial protocol can be accessed, if available                                                                                       | 5               |
| Funding                                              | 25  | Sources of funding and other support (such as supply of drugs), role of funders                                                                   | 21-22           |

\*We strongly recommend reading this statement in conjunction with the CONSORT 2010 Explanation and Elaboration for important clarifications on all the items. If relevant, we also recommend reading CONSORT extensions for cluster randomised trials, non-inferiority and equivalence trials, non-pharmacological treatments, herbal interventions, and pragmatic trials. Additional extensions are forthcoming: for those and for up to date references relevant to this checklist, see [www.consort-statement.org](http://www.consort-statement.org).
